# Supplementary material for: Hydrated metal ions as weak Brønsted acids show promoting effects on proton conduction
Source: Royal Society of Chemistry journal article supplement (doi:10.1039/d2ce00430e), 2022-01-01
Supplement: d2ce00430e1.pdf [file d2ce00430e1.pdf]

## Supporting Information

# Hydrated Metal Ions as Weak Bronsted Acids Show the Promoting Effects in Proton Conduction

Xia-Lu Huang,<sup>a</sup> Yi-Qing Chen,<sup>a</sup> Ge-Hua Wen,<sup>a</sup> Song-Song Bao,<sup>\*a</sup> and Li-Min Zheng<sup>a</sup>

<sup>a</sup>State Key Laboratory of Coordination Chemistry, School of Chemistry and Chemical Engineering, Nanjing University, Nanjing 210023, China

## Contents

|                                                                                                                                                                                                                                                                                                                                                                                                      |    |
|------------------------------------------------------------------------------------------------------------------------------------------------------------------------------------------------------------------------------------------------------------------------------------------------------------------------------------------------------------------------------------------------------|----|
| <b>Table S1.</b> Crystallographic data for <b>1·2H<sub>2</sub>O</b> , <b>1·3H<sub>2</sub>O</b> , and <b>1·5H<sub>2</sub>O</b> .                                                                                                                                                                                                                                                                      | 5  |
| <b>Table S2.</b> Selected bond lengths (Å) for <b>1·2H<sub>2</sub>O</b> and <b>1·3H<sub>2</sub>O</b> .                                                                                                                                                                                                                                                                                               | 6  |
| <b>Table S3.</b> Selected bond angles (°) for <b>1·2H<sub>2</sub>O</b> and <b>1·3H<sub>2</sub>O</b> .                                                                                                                                                                                                                                                                                                | 7  |
| <b>Table S4.</b> Selected bond lengths (Å) and angles (°) for <b>1·5H<sub>2</sub>O</b> .                                                                                                                                                                                                                                                                                                             | 8  |
| <b>Table S5.</b> Selected bond lengths (Å) and angles (°) for <b>2</b> .                                                                                                                                                                                                                                                                                                                             | 10 |
| <b>Table S6.</b> Selected bond lengths (Å) and angles (°) for <b>3</b> .                                                                                                                                                                                                                                                                                                                             | 11 |
| <b>Table S7.</b> Selected bond lengths (Å) and angles (°) for <b>4</b> .                                                                                                                                                                                                                                                                                                                             | 12 |
| <b>Table S8.</b> Hydrogen bonds present in compound <b>1·2H<sub>2</sub>O</b> .                                                                                                                                                                                                                                                                                                                       | 13 |
| <b>Table S9.</b> Hydrogen bonds present in compound <b>1·3H<sub>2</sub>O</b> .                                                                                                                                                                                                                                                                                                                       | 14 |
| <b>Table S10.</b> Hydrogen bonds present in compound <b>1·5H<sub>2</sub>O</b> .                                                                                                                                                                                                                                                                                                                      | 15 |
| <b>Table S11.</b> Hydrogen bonds present in compound <b>2</b> .                                                                                                                                                                                                                                                                                                                                      | 16 |
| <b>Table S12.</b> Hydrogen bonds present in compound <b>3</b> .                                                                                                                                                                                                                                                                                                                                      | 17 |
| <b>Table S13.</b> Hydrogen bonds present in compound <b>4</b> .                                                                                                                                                                                                                                                                                                                                      | 18 |
| <br>                                                                                                                                                                                                                                                                                                                                                                                                 |    |
| <b>Figure S1.</b> (a) The PXRD patterns for pure products of <b>1</b> , <b>2</b> , <b>3</b> , and <b>4</b> . (b) The PXRD patterns for the products with different starting reactants ratios after 24h reactions at 110 °C. (c) The PXRD patterns for the time-dependent products at 90 or 110 °C ( the molar ratio of [Co(notpH <sub>3</sub> )] / Co(NO <sub>3</sub> ) <sub>2</sub> kept at 1 : 1). | 18 |
| <b>Figure S2.</b> The PXRD patterns for products of <b>4</b> under various conditions.                                                                                                                                                                                                                                                                                                               | 19 |
| <b>Figure S3.</b> IR spectra of <b>1</b> , <b>2</b> , <b>3</b> , and <b>4</b> (KBr pellets).                                                                                                                                                                                                                                                                                                         | 20 |
| <b>Figure S4.</b> Packing diagram of <b>1·2H<sub>2</sub>O</b> .                                                                                                                                                                                                                                                                                                                                      | 21 |
| <b>Figure S5.</b> Packing diagram of <b>1·5H<sub>2</sub>O</b> .                                                                                                                                                                                                                                                                                                                                      | 21 |
| <b>Figure S6.</b> Crystal structure of <b>4</b> .                                                                                                                                                                                                                                                                                                                                                    | 22 |
| <b>Figure S7.</b> The H-bonding network of <b>1·2H<sub>2</sub>O</b> .                                                                                                                                                                                                                                                                                                                                | 23 |
| <b>Figure S8.</b> The H-bonding network of <b>1·3H<sub>2</sub>O</b> .                                                                                                                                                                                                                                                                                                                                | 23 |
| <b>Figure S9.</b> The H-bonding network of <b>2</b> .                                                                                                                                                                                                                                                                                                                                                | 24 |
| <b>Figure S10.</b> The H-bonding network of <b>3</b> .                                                                                                                                                                                                                                                                                                                                               | 25 |
| <b>Figure S11.</b> The H-bonding network of <b>4</b> .                                                                                                                                                                                                                                                                                                                                               | 26 |
| <b>Figure S12.</b> Water adsorption (filled circle) and desorption (open circle) isotherms of <b>1</b> at 25 °C.                                                                                                                                                                                                                                                                                     | 27 |
| <b>Figure S13.</b> Water adsorption (filled circle) and desorption (open circle) isotherms of <b>2</b> at 25 °C.                                                                                                                                                                                                                                                                                     | 27 |
| <b>Figure S14.</b> Water adsorption (filled circle) and desorption (open circle) isotherms of <b>3</b> at 25 °C.                                                                                                                                                                                                                                                                                     | 28 |
| <b>Figure S15.</b> Water adsorption (filled circle) and desorption (open circle) isotherms of <b>4</b> at 25 °C.                                                                                                                                                                                                                                                                                     | 28 |
| <b>Figure S16.</b> PXRD patterns for <b>1 - 4</b> after desorption.                                                                                                                                                                                                                                                                                                                                  | 29 |
| <b>Figure S17.</b> IR spectra of <b>3</b> and <b>4</b> after desorption.                                                                                                                                                                                                                                                                                                                             | 29 |
| <b>Figure S18.</b> Water adsorption (filled circle) and desorption (open circle) isotherms of <b>3</b> (without thermal pretreatment) at 25 °C.                                                                                                                                                                                                                                                      | 30 |
| <b>Figure S19.</b> Water adsorption (filled circle) and desorption (open circle) isotherms of <b>4</b> (without thermal pretreatment) at 25 °C.                                                                                                                                                                                                                                                      | 30 |
| <b>Figure S20.</b> PXRD patterns for <b>3</b> and <b>4</b> after desorption without thermal pretreatment.                                                                                                                                                                                                                                                                                            | 31 |
| <b>Figure S21.</b> Nyquist plots for the pellet of <b>1</b> at 25 °C and various RH. Up: RH increases from 40 to 95%.                                                                                                                                                                                                                                                                                | 32 |
| <b>Figure S22.</b> Nyquist plots for the pellet of compound <b>1</b> at 25 °C and various RH. Up: RH decreases from 95 to 60%.                                                                                                                                                                                                                                                                       | 33 |
| <b>Figure S23.</b> Nyquist plots for the pellet of compound <b>2</b> at 25 °C and various RH. Up: RH increases from 40 to 95%.                                                                                                                                                                                                                                                                       | 34 |
| <b>Figure S24.</b> Nyquist plots for the pellet of compound <b>2</b> at 25 °C and various RH. Up: RH decreases from 95 to 60%.                                                                                                                                                                                                                                                                       | 35 |

|                                                                                                                                                   |    |
|---------------------------------------------------------------------------------------------------------------------------------------------------|----|
| <b>Figure S25.</b> Nyquist plots for the pellet of compound <b>3</b> at 25 °C and various RH. Up: RH increases from 40 to 95%.                    | 36 |
| <b>Figure S26.</b> Nyquist plots for the pellet of compound <b>3</b> at 25 °C and various RH. Up: RH decreases from 95 to 60%.                    | 37 |
| <b>Figure S27.</b> Nyquist plots for the pellet of compound <b>4</b> at 25 °C and various RH. Up: RH increases from 40 to 95%.                    | 38 |
| <b>Figure S28.</b> Nyquist plots for the pellet of compound <b>4</b> at 25 °C and various RH (from 95 to 60%).                                    | 39 |
| <b>Figure S29.</b> Nyquist plots for the pellet of <b>1</b> at 95% RH and various temperatures (from 70 to 20 °C).                                | 40 |
| <b>Figure S30.</b> Nyquist plots for the pellet of <b>2</b> at 95% RH and various temperatures (from 70 to 20 °C).                                | 40 |
| <b>Figure S31.</b> Nyquist plots for the pellet of <b>3</b> at 95% RH and various temperatures. Up: temperature decreases from 70 to 20 °C.       | 41 |
| <b>Figure S32.</b> Nyquist plots for the pellet of <b>4</b> at 95% RH and various temperatures. Up: temperature decreases from 70 to 20 °C.       | 42 |
| <b>Figure S33.</b> PXRD patterns for <b>1 - 4</b> after AC impedance measurements.                                                                | 43 |
| <b>Figure S34.</b> Nyquist plots for a single crystal of <b>3</b> at 95% RH and various temperatures (50 to 20 °C).                               | 44 |
| <b>Figure S35.</b> Nyquist plots for a single crystal of <b>4</b> at 95% RH and various temperatures. Up: temperature decreases from 50 to 20 °C. | 45 |

**Table S1.** Crystallographic data for **1·2H<sub>2</sub>O**, **1·3H<sub>2</sub>O**, and **1·5H<sub>2</sub>O**.

|                                                                              | <b>1·2H<sub>2</sub>O</b>                                                                     | <b>1·3H<sub>2</sub>O</b>                                                                     | <b>1·5H<sub>2</sub>O</b>                                                                      |
|------------------------------------------------------------------------------|----------------------------------------------------------------------------------------------|----------------------------------------------------------------------------------------------|-----------------------------------------------------------------------------------------------|
| Temperature (K)                                                              | 190(2)                                                                                       | 296(2)                                                                                       | 190(2)                                                                                        |
| Formula                                                                      | C <sub>9</sub> H <sub>29</sub> Co <sub>2</sub> N <sub>3</sub> O <sub>14</sub> P <sub>3</sub> | C <sub>9</sub> H <sub>31</sub> Co <sub>2</sub> N <sub>3</sub> O <sub>15</sub> P <sub>3</sub> | C <sub>18</sub> H <sub>70</sub> Co <sub>4</sub> N <sub>6</sub> O <sub>34</sub> P <sub>6</sub> |
| M                                                                            | 614.12                                                                                       | 632.14                                                                                       | 1336.34                                                                                       |
| Crystal size (mm)                                                            | 0.15×0.10×0.03                                                                               | 0.15×0.05×0.03                                                                               | 0.20×0.05×0.04                                                                                |
| Crystal system                                                               | Triclinic                                                                                    | Monoclinic                                                                                   | Triclinic                                                                                     |
| Space group                                                                  | <i>P</i> -1                                                                                  | <i>C</i> 2/ <i>c</i>                                                                         | <i>P</i> -1                                                                                   |
| <i>a</i> (Å)                                                                 | 7.812(3)                                                                                     | 23.971(4)                                                                                    | 12.790(16)                                                                                    |
| <i>b</i> (Å)                                                                 | 10.859(4)                                                                                    | 7.8678(13)                                                                                   | 14.685(18)                                                                                    |
| <i>c</i> (Å)                                                                 | 12.709(5)                                                                                    | 22.429(4)                                                                                    | 15.514(19)                                                                                    |
| $\alpha$ (deg)                                                               | 89.402(15)                                                                                   | 90                                                                                           | 103.49(5)                                                                                     |
| $\beta$ (deg)                                                                | 72.201(9)                                                                                    | 93.589(8)                                                                                    | 108.36(5)                                                                                     |
| $\gamma$ (deg)                                                               | 79.402(11)                                                                                   | 90                                                                                           | 103.32(6)                                                                                     |
| <i>V</i> (Å <sup>3</sup> )                                                   | 1007.7(7)                                                                                    | 4221.7(13)                                                                                   | 2539(6)                                                                                       |
| <i>Z</i>                                                                     | 2                                                                                            | 8                                                                                            | 2                                                                                             |
| <i>D<sub>c</sub></i> (g cm <sup>-3</sup> )                                   | 2.024                                                                                        | 1.989                                                                                        | 1.748                                                                                         |
| $\mu$ (mm <sup>-1</sup> )                                                    | 1.962                                                                                        | 1.880                                                                                        | 1.573                                                                                         |
| <i>F</i> (000)                                                               | 630                                                                                          | 2600                                                                                         | 1380                                                                                          |
| <i>R</i> <sub>int</sub>                                                      | 0.0485                                                                                       | 0.0552                                                                                       | 0.0411                                                                                        |
| GOF                                                                          | 1.049                                                                                        | 1.018                                                                                        | 1.038                                                                                         |
| <i>R</i> <sub>1</sub> , w <i>R</i> <sub>2</sub> [ <i>I</i> > 2σ( <i>I</i> )] | 0.0633, 0.1329                                                                               | 0.0467, 0.0944                                                                               | 0.0739, 0.1942                                                                                |
| <i>R</i> <sub>1</sub> , w <i>R</i> <sub>2</sub> (all data)                   | 0.0994, 0.1454                                                                               | 0.0776, 0.1090                                                                               | 0.0956, 0.2099                                                                                |
| Δρ <sub>max</sub> , Δρ <sub>min</sub> (e Å <sup>-3</sup> )                   | 1.828, -1.011                                                                                | 0.828, -0.838                                                                                | 3.076, -0.994                                                                                 |
| CCDC                                                                         | 2158580                                                                                      | 2158581                                                                                      | 2158582                                                                                       |

**Table S2.** Selected bond lengths (Å) for **1·2H<sub>2</sub>O** and **1·3H<sub>2</sub>O**.

|             | <b>1·2H<sub>2</sub>O</b> | <b>1·3H<sub>2</sub>O</b> |
|-------------|--------------------------|--------------------------|
| Co(1)-O(1)  | 1.925(4)                 | 1.926(3)                 |
| Co(1)-O(4)  | 1.948(4)                 | 1.949(3)                 |
| Co(1)-O(7)  | 1.940(4)                 | 1.929(3)                 |
| Co(1)-N(1)  | 1.945(5)                 | 1.933(3)                 |
| Co(1)-N(2)  | 1.955(5)                 | 1.949(3)                 |
| Co(1)-N(3)  | 1.961(5)                 | 1.960(4)                 |
| Co(2)-O(2)  | 2.060(4)                 | 2.051(3)                 |
| Co(2)-O(2A) | 2.223(5)                 | 2.184(3)                 |
| Co(2)-O(5B) | 2.030(4)                 | 2.063(3)                 |
| Co(2)-O(1W) | 2.203(5)                 | 2.145(3)                 |
| Co(2)-O(2W) | 2.069(4)                 | 2.048(3)                 |
| Co(2)-O(3W) | 2.118(5)                 | 2.163(3)                 |

Symmetry transformations used to generate equivalent atoms: For **1·2H<sub>2</sub>O**, A: 2-x, 1-y, 2-z ; B: 1-x, 1-y, 2-z; for **1·3H<sub>2</sub>O**, A: 1-x, 1-y, 1-z ; B: 1-x, -y, 1-z.

**Table S3.** Selected bond angles (°) for **1·2H<sub>2</sub>O** and **1·3H<sub>2</sub>O**.

|                   | <b>1·2H<sub>2</sub>O</b> | <b>1·3H<sub>2</sub>O</b> |
|-------------------|--------------------------|--------------------------|
| O(1)-Co(1)-O(4)   | 92.83(18)                | 92.81(12)                |
| O(1)-Co(1)-O(7)   | 88.92(17)                | 88.84(11)                |
| O(1)-Co(1)-N(1)   | 87.99(19)                | 88.13(12)                |
| O(1)-Co(1)-N(2)   | 176.1(2)                 | 176.41(13)               |
| O(1)-Co(1)-N(3)   | 90.4(2)                  | 90.90(13)                |
| O(4)-Co(1)-O(7)   | 90.21(18)                | 90.73(12)                |
| O(4)-Co(1)-N(1)   | 92.7(2)                  | 91.54(13)                |
| O(4)-Co(1)-N(2)   | 89.3(2)                  | 88.72(13)                |
| O(4)-Co(1)-N(3)   | 176.7(2)                 | 176.28(12)               |
| O(7)-Co(1)-N(1)   | 175.9(2)                 | 176.30(13)               |
| O(7)-Co(1)-N(2)   | 94.40(19)                | 94.39(12)                |
| O(7)-Co(1)-N(3)   | 89.51(19)                | 89.48(13)                |
| N(1)-Co(1)-N(2)   | 88.6(2)                  | 88.58(14)                |
| N(1)-Co(1)-N(3)   | 87.8(2)                  | 88.44(14)                |
| N(2)-Co(1)-N(3)   | 87.5(2)                  | 87.56(14)                |
| O(2)-Co(2)-O(2A)  | 80.07(19)                | 80.00(12)                |
| O(2)-Co(2)-O(5B)  | 95.93(16)                | 95.97(10)                |
| O(2)-Co(2)-O(1W)  | 94.16(18)                | 93.36(11)                |
| O(2)-Co(2)-O(2W)  | 173.79(16)               | 171.03(11)               |
| O(2)-Co(2)-O(3W)  | 88.44(18)                | 84.23(10)                |
| O(2A)-Co(2)-O(5B) | 94.73(17)                | 89.79(11)                |
| O(2A)-Co(2)-O(1W) | 173.83(16)               | 172.52(11)               |
| O(2A)-Co(2)-O(2W) | 97.40(16)                | 99.46(11)                |
| O(2A)-Co(2)-O(3W) | 85.3(2)                  | 82.55(11)                |
| O(5B)-Co(2)-O(1W) | 83.65(18)                | 87.46(11)                |
| O(5B)-Co(2)-O(2W) | 89.91(16)                | 92.97(11)                |
| O(5B)-Co(2)-O(3W) | 175.56(18)               | 172.19(12)               |
| O(1W)-Co(2)-O(2W) | 88.56(17)                | 87.64(12)                |
| O(1W)-Co(2)-O(3W) | 96.8(2)                  | 100.33(11)               |
| O(2W)-Co(2)-O(3W) | 85.69(18)                | 86.83(11)                |

Symmetry transformations used to generate equivalent atoms: For **1·2H<sub>2</sub>O**, A: 2-x, 1-y, 2-z ; B: 1-x, 1-y, 2-z; for **1·3H<sub>2</sub>O**, A: 1-x, 1-y, 1-z ; B: 1-x, -y, 1-z.

**Table S4.** Selected bond lengths (Å) and angles (°) for **1·5H<sub>2</sub>O**.

|                   |            |                    |            |
|-------------------|------------|--------------------|------------|
| Co(1)-O(1)        | 1.943(5)   | Co(3)-O(11)        | 1.921(5)   |
| Co(1)-O(4)        | 1.918(5)   | Co(3)-O(13)        | 1.948(5)   |
| Co(1)-O(7)        | 1.930(6)   | Co(3)-O(16)        | 1.932(6)   |
| Co(1)-N(1)        | 1.933(6)   | Co(3)-N(4)         | 1.945(7)   |
| Co(1)-N(2)        | 1.944(7)   | Co(3)-N(5)         | 1.930(6)   |
| Co(1)-N(3)        | 1.941(6)   | Co(3)-N(6)         | 1.946(6)   |
| Co(2)-O(2)        | 2.071(5)   | Co(4)-O(6B)        | 2.270(6)   |
| Co(2)-O(6A)       | 2.083(5)   | Co(4)-O(10C)       | 2.078(5)   |
| Co(2)-O(10)       | 2.140(6)   | Co(4)-O(14)        | 2.022(5)   |
| Co(2)-O(1W)       | 2.139(6)   | Co(4)-O(4W)        | 2.167(6)   |
| Co(2)-O(2W)       | 2.094(5)   | Co(4)-O(5W)        | 2.060(5)   |
| Co(2)-O(3W)       | 2.099(5)   | Co(4)-O(6W)        | 2.110(5)   |
| O(1)-Co(1)-O(4)   | 92.7(2)    | O(11)-Co(3)-O(13)  | 92.7(2)    |
| O(1)-Co(1)-O(7)   | 90.0(2)    | O(11)-Co(3)-O(16)  | 89.1(2)    |
| O(1)-Co(1)-N(1)   | 88.3(2)    | O(11)-Co(3)-N(4)   | 88.5(2)    |
| O(1)-Co(1)-N(2)   | 91.5(2)    | O(11)-Co(3)-N(5)   | 176.8(2)   |
| O(1)-Co(1)-N(3)   | 176.6(2)   | O(11)-Co(3)-N(6)   | 89.9(2)    |
| O(4)-Co(1)-O(7)   | 88.9(2)    | O(13)-Co(3)-O(16)  | 90.3(2)    |
| O(4)-Co(1)-N(1)   | 177.8(2)   | O(13)-Co(3)-N(4)   | 92.1(3)    |
| O(4)-Co(1)-N(2)   | 88.3(2)    | O(13)-Co(3)-N(5)   | 89.0(2)    |
| O(4)-Co(1)-N(3)   | 90.7(2)    | O(13)-Co(3)-N(6)   | 177.4(2)   |
| O(7)-Co(1)-N(1)   | 93.1(2)    | O(16)-Co(3)-N(4)   | 176.7(2)   |
| O(7)-Co(1)-N(2)   | 176.8(2)   | O(16)-Co(3)-N(5)   | 93.6(2)    |
| O(7)-Co(1)-N(3)   | 89.7(2)    | O(16)-Co(3)-N(6)   | 89.3(2)    |
| N(1)-Co(1)-N(2)   | 89.7(3)    | N(4)-Co(3)-N(5)    | 88.7(3)    |
| N(1)-Co(1)-N(3)   | 88.3(2)    | N(4)-Co(3)-N(6)    | 88.3(3)    |
| N(2)-Co(1)-N(3)   | 88.9(3)    | N(5)-Co(3)-N(6)    | 88.4(3)    |
| O(2)-Co(2)-O(6A)  | 93.18(19)  | O(6B)-Co(4)-O(10C) | 76.66(19)  |
| O(2)-Co(2)-O(10)  | 87.5(2)    | O(6B)-Co(4)-O(14)  | 104.8(2)   |
| O(2)-Co(2)-O(1W)  | 86.2(2)    | O(6B)-Co(4)-O(4W)  | 158.4(2)   |
| O(2)-Co(2)-O(2W)  | 88.22(19)  | O(6B)-Co(4)-O(5W)  | 101.3(2)   |
| O(2)-Co(2)-O(3W)  | 171.5(2)   | O(6B)-Co(4)-O(6W)  | 79.4(2)    |
| O(6A)-Co(2)-O(10) | 79.5(2)    | O(10C)-Co(4)-O(14) | 88.4(2)    |
| O(6A)-Co(2)-O(1W) | 94.3(2)    | O(10C)-Co(4)-O(4W) | 93.4(2)    |
| O(6A)-Co(2)-O(2W) | 178.35(19) | O(10C)-Co(4)-O(5W) | 177.24(19) |
| O(6A)-Co(2)-O(3W) | 93.2(2)    | O(10C)-Co(4)-O(6W) | 91.60(19)  |
| O(10)-Co(2)-O(1W) | 170.9(2)   | O(14)-Co(4)-O(4W)  | 93.8(2)    |
| O(10)-Co(2)-O(2W) | 99.7(2)    | O(14)-Co(4)-O(5W)  | 90.4(2)    |
| O(10)-Co(2)-O(3W) | 88.2(2)    | O(14)-Co(4)-O(6W)  | 175.7(2)   |
| O(1W)-Co(2)-O(2W) | 86.6(2)    | O(4W)-Co(4)-O(5W)  | 89.2(2)    |
| O(1W)-Co(2)-O(3W) | 98.9(2)    | O(4W)-Co(4)-O(6W)  | 81.9(2)    |
| O(2W)-Co(2)-O(3W) | 85.3(2)    | O(5W)-Co(4)-O(6W)  | 89.78(19)  |

Symmetry transformations used to generate equivalent atoms: A: 1-x,1-y,2-z; B: x,y,-1+z; C: 1-x,1-y,1-z.

**Table S5.** Selected bond lengths (Å) and angles (°) for **2**.

|                 |          |                   |          |
|-----------------|----------|-------------------|----------|
| Co(1)-O(1)      | 1.926(5) | Co(1)-N(3)        | 1.946(6) |
| Co(1)-O(4)      | 1.934(6) | Co(2)-O(2)        | 1.936(6) |
| Co(1)-O(7)      | 1.937(6) | Co(2)-O(3A)       | 1.980(6) |
| Co(1)-N(1)      | 1.932(7) | Co(2)-O(8B)       | 1.932(6) |
| Co(1)-N(2)      | 1.952(7) | Co(2)-O(1W)       | 1.975(6) |
|                 |          |                   |          |
| O(1)-Co(1)-O(4) | 90.8(2)  | O(7)-Co(1)-N(3)   | 89.4(3)  |
| O(1)-Co(1)-O(7) | 91.5(3)  | N(1)-Co(1)-N(2)   | 88.5(3)  |
| O(1)-Co(1)-N(1) | 88.2(3)  | N(1)-Co(1)-N(3)   | 88.8(3)  |
| O(1)-Co(1)-N(2) | 91.1(3)  | N(2)-Co(1)-N(3)   | 88.0(3)  |
| O(1)-Co(1)-N(3) | 176.9(3) | O(2)-Co(2)-O(3A)  | 109.9(3) |
| O(4)-Co(1)-O(7) | 90.3(3)  | O(2)-Co(2)-O(8B)  | 113.0(3) |
| O(4)-Co(1)-N(1) | 177.4(3) | O(2)-Co(2)-O(1W)  | 104.2(3) |
| O(4)-Co(1)-N(2) | 89.2(3)  | O(3A)-Co(2)-O(8B) | 108.4(3) |
| O(4)-Co(1)-N(3) | 92.2(3)  | O(3A)-Co(2)-O(1W) | 108.5(3) |
| O(7)-Co(1)-N(1) | 92.1(3)  | O(8B)-Co(2)-O(1W) | 112.8(3) |
| O(7)-Co(1)-N(2) | 177.3(3) |                   |          |

Symmetry transformations used to generate equivalent atoms: A: 1.5-x, y, 0.5+z; B: 1.5-x, -1+y, 0.5+z.



**Table S6.** Selected bond lengths (Å) and angles (°) for **3**.

|                   |            |                    |            |
|-------------------|------------|--------------------|------------|
| Co(1)-O(1)        | 1.9323(13) | Co(2)-O(4W)        | 2.1129(15) |
| Co(1)-O(4)        | 1.9375(13) | Co(2)-O(5W)        | 2.1221(14) |
| Co(1)-O(7)        | 1.9553(14) | Co(2)-O(6W)        | 2.1423(16) |
| Co(1)-N(1)        | 1.9531(16) | Co(3)-O(5)         | 2.0631(13) |
| Co(1)-N(2)        | 1.9497(17) | Co(3)-O(5A)        | 2.0631(13) |
| Co(1)-N(3)        | 1.9376(16) | Co(3)-O(9B)        | 2.1192(14) |
| Co(2)-O(2)        | 2.0635(14) | Co(3)-O(9C)        | 2.1192(14) |
| Co(2)-O(2W)       | 2.0588(15) | Co(3)-O(1W)        | 2.1992(14) |
| Co(2)-O(3W)       | 2.1040(14) | Co(3)-O(1WA)       | 2.1991(14) |
| O(1)-Co(1)-O(4)   | 89.49(6)   | O(2W)-Co(2)-O(6W)  | 91.19(6)   |
| O(1)-Co(1)-O(7)   | 91.55(6)   | O(3W)-Co(2)-O(4W)  | 88.25(6)   |
| O(1)-Co(1)-N(1)   | 88.64(6)   | O(3W)-Co(2)-O(5W)  | 86.63(5)   |
| O(1)-Co(1)-N(2)   | 92.43(7)   | O(3W)-Co(2)-O(6W)  | 88.68(6)   |
| O(1)-Co(1)-N(3)   | 177.40(6)  | O(4W)-Co(2)-O(5W)  | 88.04(6)   |
| O(4)-Co(1)-O(7)   | 91.93(6)   | O(4W)-Co(2)-O(6W)  | 176.90(6)  |
| O(4)-Co(1)-N(1)   | 175.98(7)  | O(5W)-Co(2)-O(6W)  | 92.15(6)   |
| O(4)-Co(1)-N(2)   | 88.76(6)   | O(5)-Co(3)-O(5A)   | 180.0      |
| O(4)-Co(1)-N(3)   | 93.07(6)   | O(5)-Co(3)-O(9B)   | 88.85(6)   |
| O(7)-Co(1)-N(1)   | 91.68(6)   | O(5)-Co(3)-O(9C)   | 91.15(6)   |
| O(7)-Co(1)-N(2)   | 175.96(6)  | O(5)-Co(3)-O(1W)   | 91.41(5)   |
| O(7)-Co(1)-N(3)   | 87.92(6)   | O(5)-Co(3)-O(1WA)  | 88.59(5)   |
| N(1)-Co(1)-N(2)   | 87.76(7)   | O(5A)-Co(3)-O(9B)  | 91.15(6)   |
| N(1)-Co(1)-N(3)   | 88.83(7)   | O(5A)-Co(3)-O(9C)  | 88.85(6)   |
| N(2)-Co(1)-N(3)   | 88.07(7)   | O(5A)-Co(3)-O(1W)  | 88.59(5)   |
| O(2)-Co(2)-O(2W)  | 93.56(7)   | O(5A)-Co(3)-O(1WA) | 91.41(5)   |
| O(2)-Co(2)-O(3W)  | 171.88(6)  | O(9B)-Co(3)-O(9C)  | 180.00(7)  |
| O(2)-Co(2)-O(4W)  | 89.75(6)   | O(9B)-Co(3)-O(1W)  | 90.88(6)   |
| O(2)-Co(2)-O(5W)  | 85.43(6)   | O(9B)-Co(3)-O(1WA) | 89.12(6)   |
| O(2)-Co(2)-O(6W)  | 93.35(6)   | O(9C)-Co(3)-O(1W)  | 89.12(6)   |
| O(2W)-Co(2)-O(3W) | 94.27(6)   | O(9C)-Co(3)-O(1WA) | 90.88(6)   |
| O(2W)-Co(2)-O(4W) | 88.67(6)   | O(1W)-Co(3)-O(1WA) | 180.0      |
| O(2W)-Co(2)-O(5W) | 176.56(7)  |                    |            |

Symmetry transformations used to generate equivalent atoms: A: 2-x, 1-y, 2-z; B: x, 1.5-y, 0.5+z; C: 2-x, -0.5+y, 1.5-z.

**Table S7.** Selected bond lengths (Å) and angles (°) for **4**.

|                   |            |                    |            |
|-------------------|------------|--------------------|------------|
| Co(1)-O(1)        | 1.9306(14) | Ni(1)-O(4W)        | 2.0594(16) |
| Co(1)-O(4)        | 1.9377(14) | Ni(1)-O(5W)        | 2.0676(14) |
| Co(1)-O(7)        | 1.9571(14) | Ni(1)-O(6W)        | 2.0883(15) |
| Co(1)-N(1)        | 1.9530(17) | Ni(2)-O(5)         | 2.0526(13) |
| Co(1)-N(2)        | 1.9495(17) | Ni(2)-O(5A)        | 2.0526(13) |
| Co(1)-N(3)        | 1.9341(17) | Ni(2)-O(9B)        | 2.0992(14) |
| Ni(1)-O(2)        | 2.0497(14) | Ni(2)-O(9C)        | 2.0992(14) |
| Ni(1)-O(2W)       | 2.0462(16) | Ni(2)-O(1W)        | 2.1315(15) |
| Ni(1)-O(3W)       | 2.0744(14) | Ni(2)-O(1WA)       | 2.1315(15) |
| O(1)-Co(1)-O(4)   | 89.36(6)   | O(2W)-Ni(1)-O(6W)  | 90.05(6)   |
| O(1)-Co(1)-O(7)   | 91.29(6)   | O(3W)-Ni(1)-O(4W)  | 89.13(6)   |
| O(1)-Co(1)-N(1)   | 88.82(6)   | O(3W)-Ni(1)-O(5W)  | 88.04(6)   |
| O(1)-Co(1)-N(2)   | 92.65(6)   | O(3W)-Ni(1)-O(6W)  | 88.52(6)   |
| O(1)-Co(1)-N(3)   | 177.45(6)  | O(4W)-Ni(1)-O(5W)  | 88.80(6)   |
| O(4)-Co(1)-O(7)   | 92.05(6)   | O(4W)-Ni(1)-O(6W)  | 177.39(6)  |
| O(4)-Co(1)-N(1)   | 175.91(7)  | O(5W)-Ni(1)-O(6W)  | 92.24(6)   |
| O(4)-Co(1)-N(2)   | 88.69(6)   | O(5)-Ni(2)-O(5A)   | 180.0      |
| O(4)-Co(1)-N(3)   | 93.07(7)   | O(5)-Ni(2)-O(9B)   | 89.01(6)   |
| O(7)-Co(1)-N(1)   | 91.66(6)   | O(5)-Ni(2)-O(9C)   | 90.99(6)   |
| O(7)-Co(1)-N(2)   | 176.01(6)  | O(5)-Ni(2)-O(1W)   | 92.19(5)   |
| O(7)-Co(1)-N(3)   | 87.85(6)   | O(5)-Ni(2)-O(1WA)  | 87.81(5)   |
| N(1)-Co(1)-N(2)   | 87.73(7)   | O(5A)-Ni(2)-O(9B)  | 89.01(6)   |
| N(1)-Co(1)-N(3)   | 88.80(7)   | O(5A)-Ni(2)-O(9C)  | 90.99(6)   |
| N(2)-Co(1)-N(3)   | 88.19(7)   | O(5A)-Ni(2)-O(1W)  | 87.81(5)   |
| O(2)-Ni(1)-O(2W)  | 93.22(7)   | O(5A)-Ni(2)-O(1WA) | 92.19(5)   |
| O(2)-Ni(1)-O(3W)  | 173.70(6)  | O(9B)-Ni(2)-O(9C)  | 180.00(7)  |
| O(2)-Ni(1)-O(4W)  | 88.56(6)   | O(9B)-Ni(2)-O(1W)  | 90.23(6)   |
| O(2)-Ni(1)-O(5W)  | 86.05(6)   | O(9B)-Ni(2)-O(1WA) | 89.78(6)   |
| O(2)-Ni(1)-O(6W)  | 93.90(6)   | O(9C)-Ni(2)-O(1W)  | 89.77(6)   |
| O(2W)-Ni(1)-O(3W) | 92.60(6)   | O(9C)-Ni(2)-O(1WA) | 90.22(6)   |
| O(2W)-Ni(1)-O(4W) | 88.92(6)   | O(1W)-Ni(2)-O(1WA) | 180.0      |
| O(2W)-Ni(1)-O(5W) | 177.63(7)  |                    |            |

Symmetry transformations used to generate equivalent atoms: A: 2-x, 1-y, 2-z; B: x, 1.5-y, 0.5+z; C: 2-x, -0.5+y, 1.5-z.

**Table S8.** Hydrogen bonds present in compound **1·2H<sub>2</sub>O**.

| <b>D-H···A</b>     | <b>d(D-H) (Å)</b> | <b>d(H···A) (Å)</b> | <b>d(D···A) (Å)</b> | <b>∠ DHA (°)</b> |
|--------------------|-------------------|---------------------|---------------------|------------------|
| O8-H8C···O6(i)     | 0.84              | 1.67                | 2.495(5)            | 165.7            |
| O1W-H1WA···O5W(ii) | 0.90              | 1.99                | 2.877(7)            | 167.1            |
| O1W-H1WB···O6(iii) | 0.90              | 1.87                | 2.768(6)            | 172.1            |
| O2W-H2WA···O1(iv)  | 0.90              | 1.96                | 2.789(6)            | 153.2            |
| O2W-H2WB···O9(ii)  | 0.90              | 1.78                | 2.676(6)            | 171.3            |
| O3W-H3WA···O4(iv)  | 0.90              | 1.92                | 2.820(7)            | 178.9            |
| O3W-H3WB···O4W(v)  | 0.90              | 2.31                | 3.093(8)            | 145.6            |
| O4W-H4WA···O3(v)   | 0.90              | 1.88                | 2.768(6)            | 167.3            |
| O4W-H4WB···O3      | 0.90              | 1.83                | 2.729(7)            | 173.1            |
| O5W-H5WA···O9      | 0.90              | 1.76                | 2.641(7)            | 165.2            |
| O5W-H5WB···O4W(vi) | 0.90              | 1.86                | 2.682(7)            | 150.1            |

Symmetry transformations used to generate equivalent atoms: i: 2-x, 1-y, 1-z; ii: x, y, 1+z; iii: 1-x, 1-y, 2-z; iv: 2-x, 1-y, 2-z; v: 2-x, 2-y, 2-z; vi: 2-x, 2-y, 1-z.

**Table S9.** Hydrogen bonds present in compound **1·3H<sub>2</sub>O**.

| <b>D-H···A</b>     | <b>d(D-H) (Å)</b> | <b>d(H···A) (Å)</b> | <b>d(D···A) (Å)</b> | <b>∠ DHA (°)</b> |
|--------------------|-------------------|---------------------|---------------------|------------------|
| O8-H8C···O6(i)     | 0.82              | 1.75                | 2.556(4)            | 167.0            |
| O1W-H1WA···O5W(ii) | 0.90              | 1.95                | 2.847(5)            | 175.5            |
| O1W-H1WB···O6(iii) | 0.90              | 1.87                | 2.754(4)            | 167.5            |
| O2W-H2WA···O1(iv)  | 0.90              | 1.98                | 2.766(4)            | 144.6            |
| O2W-H2WB···O9(ii)  | 0.90              | 1.77                | 2.670(4)            | 178.6            |
| O3W-H3WA···O5(v)   | 0.90              | 2.18                | 3.059(4)            | 164.9            |
| O3W-H3WB···O4(iv)  | 0.90              | 1.92                | 2.814(4)            | 175.4            |
| O4W-H4WA···O6W(i)  | 0.90              | 2.37                | 3.087(5)            | 136.3            |
| O4W-H4WB···O6      | 0.90              | 2.00                | 2.876(5)            | 164.6            |
| O5W-H5WA···O6W     | 0.90              | 1.88                | 2.707(5)            | 152.1            |
| O5W-H5WB···O9      | 0.90              | 1.85                | 2.698(5)            | 156.9            |
| O6W-H6WA···O3(vi)  | 0.90              | 1.83                | 2.717(4)            | 167.7            |
| O6W-H6WB···O3(vii) | 0.90              | 1.91                | 2.792(5)            | 167.4            |

Symmetry transformations used to generate equivalent atoms: i: 1.5-x, 0.5-y, 1-z; ii: -0.5+x, 0.5+y, z; iii: 1-x, -y, 1-z; iv: 1-x, 1-y, 1-z; v: x, 1+y, z; vi: 0.5+x, -0.5+y, z; vii: 1.5-x, -0.5+y, 0.5-z.

**Table S10.** Hydrogen bonds present in compound **1·5H<sub>2</sub>O**.

| <b>D-H···A</b>      | <b>d(D-H) (Å)</b> | <b>d(H···A) (Å)</b> | <b>d(D···A) (Å)</b> | <b>∠ DHA (°)</b> |
|---------------------|-------------------|---------------------|---------------------|------------------|
| O8-H8C···O15(i)     | 0.84              | 1.66                | 2.474(8)            | 163.8            |
| O17-H17C···O3(i)    | 0.84              | 1.74                | 2.556(7)            | 164.7            |
| O1W-H1WA···O3       | 0.91              | 1.98                | 2.822(8)            | 153.5            |
| O1W-H1WB···O16W     | 0.90              | 2.03                | 2.697(18)           | 129.5            |
| O2W-H2WA···O11      | 0.90              | 1.99                | 2.773(8)            | 144.3            |
| O2W-H2WB···O9(i)    | 0.90              | 1.85                | 2.712(7)            | 161.0            |
| O3W-H3WA···O10W(ii) | 0.90              | 1.96                | 2.785(13)           | 151.4            |
| O3W-H3WB···O13      | 0.90              | 1.91                | 2.811(7)            | 175.3            |
| O4W-H4WA···O12(ii)  | 0.90              | 1.75                | 2.632(8)            | 165.8            |
| O4W-H4WB···O13W(ii) | 0.90              | 1.97                | 2.852(8)            | 165.3            |
| O5W-H5WA···O7(iii)  | 0.90              | 2.20                | 2.973(7)            | 143.6            |
| O5W-H5WB···O18(iv)  | 0.90              | 1.79                | 2.688(8)            | 172.0            |
| O6W-H6WA···O1(iii)  | 0.90              | 1.79                | 2.662(7)            | 160.3            |
| O6W-H6WB···O2(ii)   | 0.90              | 1.83                | 2.703(8)            | 162.2            |

Symmetry transformations used to generate equivalent atoms: i: 2-x, 1-y, 2-z; ii: 1-x, 1-y, 1-z; iii: x, y, -1+z; iv: 2-x, 1-y, 1-z.

**Table S11.** Hydrogen bonds are present in compound **2**.

| <b>D-H...A</b>     | <b>d(D-H) (Å)</b> | <b>d(H...A) (Å)</b> | <b>d(D...A) (Å)</b> | <b>∠ DHA (°)</b> |
|--------------------|-------------------|---------------------|---------------------|------------------|
| O5-H5C...O2W(i)    | 0.82              | 1.67                | 2.458(9)            | 159.8            |
| O1W-H1WA...O6(ii)  | 0.90              | 1.79                | 2.624(7)            | 153.3            |
| O1W-H1WB...O7(iii) | 0.90              | 2.06                | 2.840(6)            | 144.4            |
| O2W-H2WA...O9(iv)  | 0.90              | 1.73                | 2.444(9)            | 133.8            |
| O2W-H2WB...O3W(v)  | 0.90              | 1.88                | 2.649(10)           | 141.7            |
| O3W-H3WA...O3      | 0.90              | 1.97                | 2.816(8)            | 156.2            |
| O3W-H3WB...O6(ii)  | 0.90              | 1.93                | 2.802(8)            | 163.8            |

Symmetry transformations used to generate equivalent atoms: i: 2-x, 1-y, -0.5+z; ii: -0.5+x, 1-y, z; iii: 1.5-x, y, 0.5+z; iv: x, y, 1+z; v: 1.5-x, 1+y, 0.5+z.

**Table S12.** Hydrogen bonds are present in compound **3**.

| <b>D-H...A</b>      | <b>d(D-H) (Å)</b> | <b>d(H...A) (Å)</b> | <b>d(D...A) (Å)</b> | <b>∠ DHA (°)</b> |
|---------------------|-------------------|---------------------|---------------------|------------------|
| O1W-H1WA...O8(i)    | 0.90              | 1.86                | 2.757(2)            | 169.6            |
| O1W-H1WB...O6       | 0.90              | 1.93                | 2.790(2)            | 158.3            |
| O2W-H2WA...O7W(ii)  | 0.90              | 1.81                | 2.677(2)            | 160.1            |
| O2W-H2WB...O1W(iii) | 0.90              | 1.89                | 2.764(2)            | 162.1            |
| O3W-H3WA...O8(iv)   | 0.90              | 1.91                | 2.768(2)            | 157.7            |
| O3W-H3WB...O4(iv)   | 0.90              | 1.84                | 2.727(2)            | 166.3            |
| O4W-H4WA...O1(iv)   | 0.90              | 1.79                | 2.6802(19)          | 165.9            |
| O4W-H4WB...O6(iv)   | 0.90              | 2.05                | 2.888(2)            | 152.6            |
| O5W-H5WA...O7(iv)   | 0.90              | 1.84                | 2.7269(19)          | 167.4            |
| O5W-H5WB...O2(iv)   | 0.90              | 1.90                | 2.750(2)            | 156.0            |
| O6W-H6WA...O8(v)    | 0.90              | 2.01                | 2.897(2)            | 168.2            |
| O6W-H6WB...O3       | 0.90              | 1.76                | 2.651(2)            | 169.9            |
| O7W-H7WA...O6(iii)  | 0.90              | 1.95                | 2.755(2)            | 148.2            |
| O7W-H7WB...O3       | 0.90              | 1.81                | 2.647(2)            | 153.7            |

Symmetry transformations used to generate equivalent atoms: i: 2-x, -0.5+y, 1.5-z; ii: x, 1.5-y, -0.5+z; iii: 1-x, 0.5+y, 1.5-z; iv: 1-x, 1-y, 1-z; v: -1+x, y, z.

**Table S13.** Hydrogen bonds are present in compound 4.

| <b>D-H···A</b>      | <b>d(D-H) (Å)</b> | <b>d(H···A) (Å)</b> | <b>d(D···A) (Å)</b> | <b>∠ DHA (°)</b> |
|---------------------|-------------------|---------------------|---------------------|------------------|
| O1W-H1WA···O8(i)    | 0.90              | 1.85                | 2.731(2)            | 165.5            |
| O1W-H1WB···O6       | 0.90              | 1.90                | 2.778(2)            | 164.7            |
| O2W-H2WA···O7W(ii)  | 0.90              | 1.80                | 2.678(2)            | 165.6            |
| O2W-H2WB···O1W(iii) | 0.90              | 1.94                | 2.799(2)            | 159.6            |
| O3W-H3WA···O8(iv)   | 0.90              | 1.93                | 2.780(2)            | 157.7            |
| O3W-H3WB···O4(iv)   | 0.90              | 1.84                | 2.726(2)            | 167.0            |
| O4W-H4WA···O1(iv)   | 0.90              | 1.77                | 2.664(2)            | 170.0            |
| O4W-H4WB···O6(iv)   | 0.90              | 2.15                | 2.932(2)            | 145.3            |
| O5W-H5WA···O7(iv)   | 0.90              | 1.84                | 2.7164(19)          | 165.0            |
| O5W-H5WB···O2(iv)   | 0.90              | 1.89                | 2.750(2)            | 158.2            |
| O6W-H6WA···O8(v)    | 0.90              | 2.05                | 2.918(2)            | 163.2            |
| O6W-H6WB···O3       | 0.90              | 1.74                | 2.627(2)            | 166.3            |
| O7W-H7WA···O6(iii)  | 0.90              | 1.94                | 2.731(2)            | 145.8            |
| O7W-H7WB···O3       | 0.90              | 1.86                | 2.646(2)            | 145.3            |

Symmetry transformations used to generate equivalent atoms: i: 2-x, -0.5+y, 1.5-z; ii: x, 1.5-y, -0.5+z; iii: 1-x, 0.5+y, 1.5-z; iv: 1-x, 1-y, 1-z; v: -1+x, y, z.



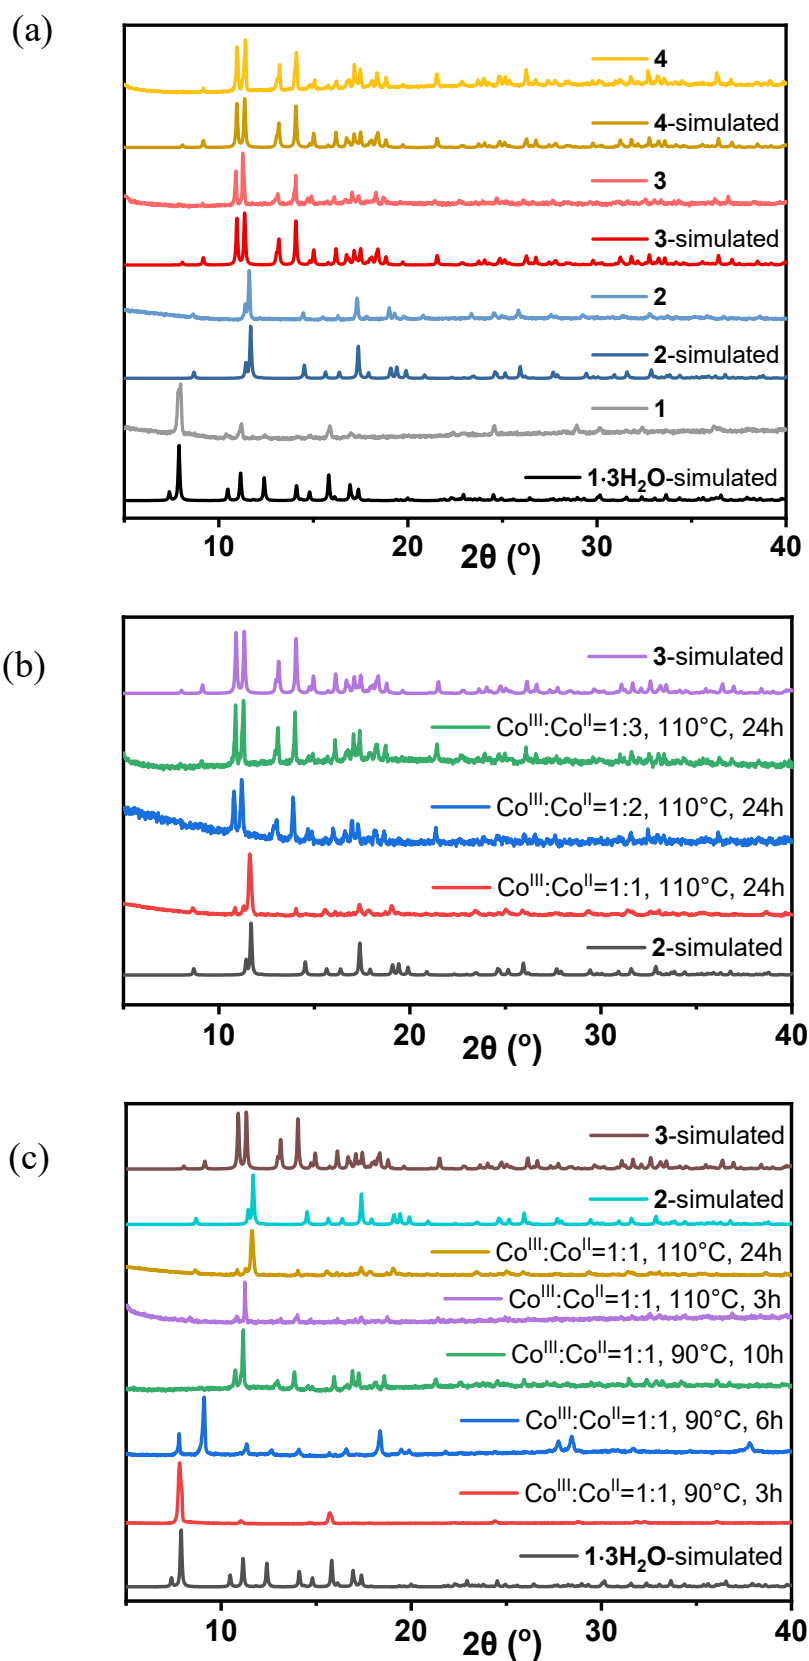

**Figure S1.** (a) The PXRD patterns for pure products of 1, 2, 3, and 4. (b) The PXRD patterns for the products with different starting reactants ratios after 24 h reactions at 110 °C. (c) The PXRD patterns for the time-dependent products at 90 or 110 °C (the molar ratio of Co(notpH<sub>3</sub>) / Co(NO<sub>3</sub>)<sub>2</sub> kept at 1 : 1).

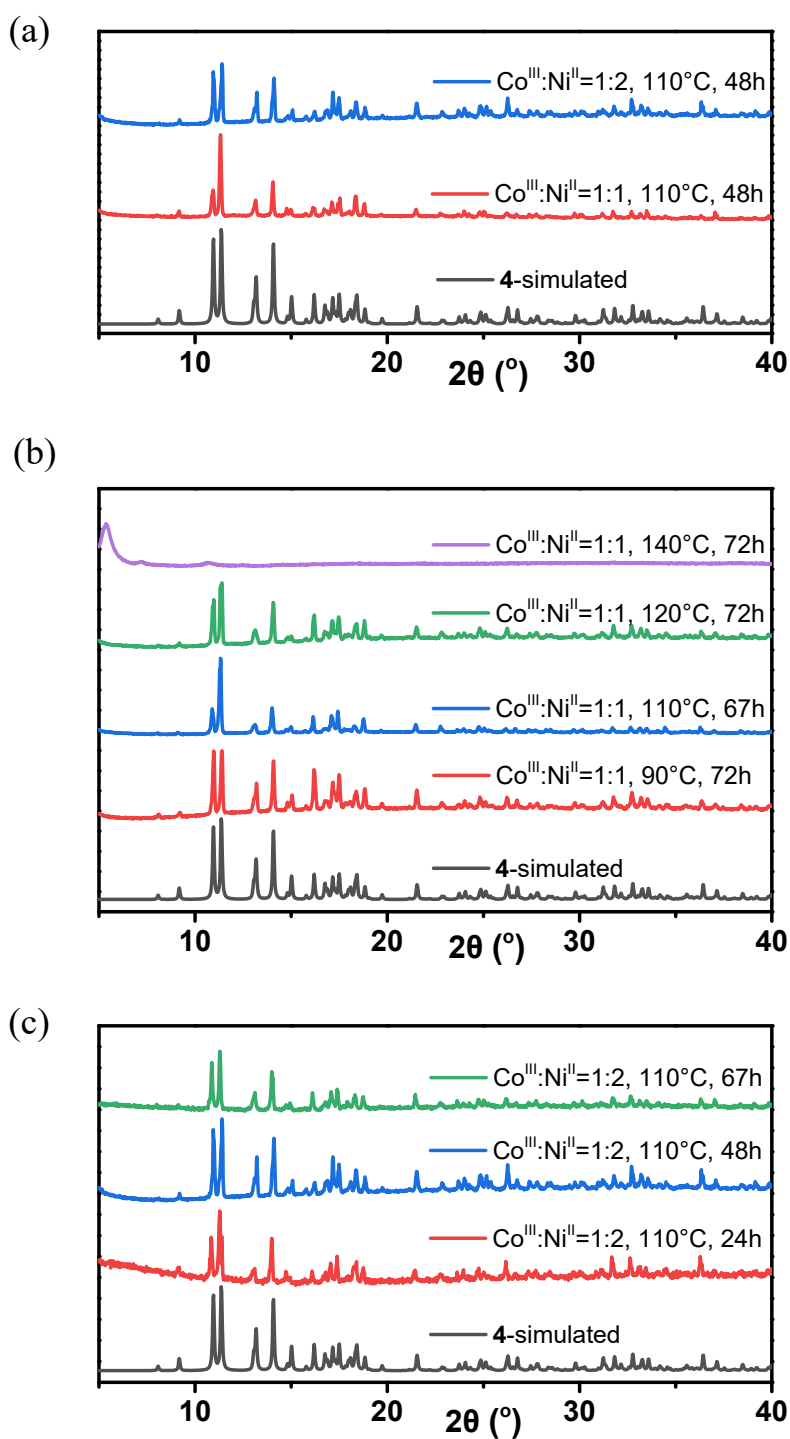

**Figure S2.** The PXRD patterns for products of **4** under various conditions: (a) the different molar ratio of  $[\text{Co}(\text{notpH}_3)] / \text{NiCl}_2$ ; (b) the different reaction temperature; (c) the different reaction time.

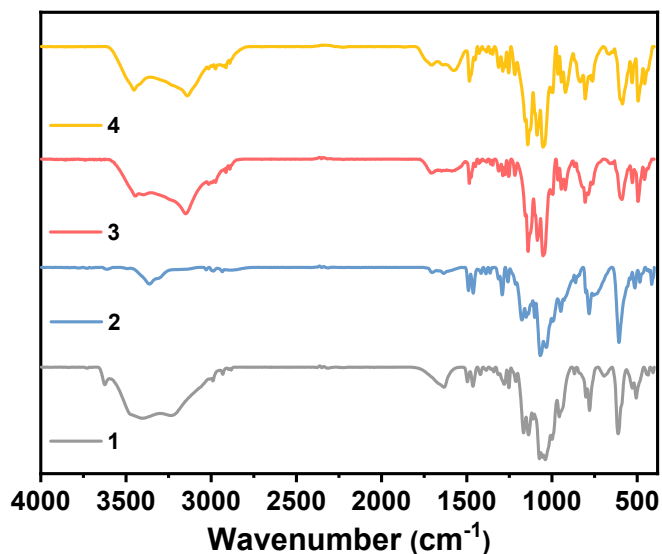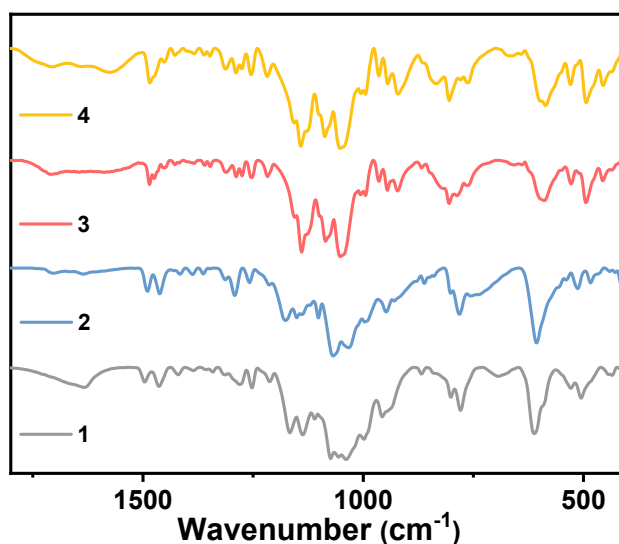

**Figure S3.** IR spectra of **1**, **2**, **3**, and **4** (KBr pellets). [Peaks ( $\text{cm}^{-1}$ ). **1**· $\text{nH}_2\text{O}$ : 3727(w), 3624(w), 3404(m), 3239(m), 2990(w), 2932(w), 2883(w), 2311(w), 1633(w), 1496(w), 1464(w), 1420(w), 1386(w), 1342(w), 1315(w), 1281(w), 1253(w), 1212(w), 1167(m), 1137(m), 1110(m), 1074(s), 1056(s), 1039(s), 999(s), 957(m), 868(w), 801(m), 779(m), 694(w), 612(m), 529(w), 506(w), 435(w), 407(w). **2**: 3362(w), 3029(w), 2986(w), 2935(w), 1703(w), 1635(w), 1490(w), 1462(w), 1416(w), 1387(w), 1363(w), 1313(w), 1292(w), 1258(w), 1213(w), 1177(m), 1151(m), 1139(m), 1102(m), 1068(s), 1033(s), 996(m), 948(m), 930(m), 861(w), 802(w), 782(m), 756(w), 607(s), 539(w), 513(w), 484(w), 440(w), 428(w), 414(w). **3**: 3444(m), 3397(m), 3148(m), 3015(w), 2975(w), 2913(w), 2890(w), 1707(w), 1645(w), 1588(w), 1485(w), 1474(w), 1450(w), 1428(w), 1384(w), 1360(w), 1347(w), 1288(w), 1275(w), 1254(w), 1217(w), 1155(m), 1140(s), 1086(s), 1052(s), 1006(m), 995(m), 965(w), 945(m), 922(m), 868(w), 805(m), 787(m), 765(w), 658(w), 640(w), 589(m), 528(w), 495(m), 456(w). **4**: 3449(m), 3142(m), 3016(w), 2976(w), 2927(w), 2914(w), 2891(w), 1704(w), 1580(w), 1485(w), 1474(w), 1454(w), 1427(w), 1383(w), 1360(w), 1348(w), 1311(w), 1288(w), 1275(w), 1253(w), 1217(w), 1156(m), 1142(s), 1128(s), 1087(s), 1053(s), 1005(m), 995(m), 964(w), 945(m), 922(m), 835(m), 806(m), 779(w), 766(w), 670(w), 639(w), 600(m), 587(m), 531(w), 496(m), 457(w).]

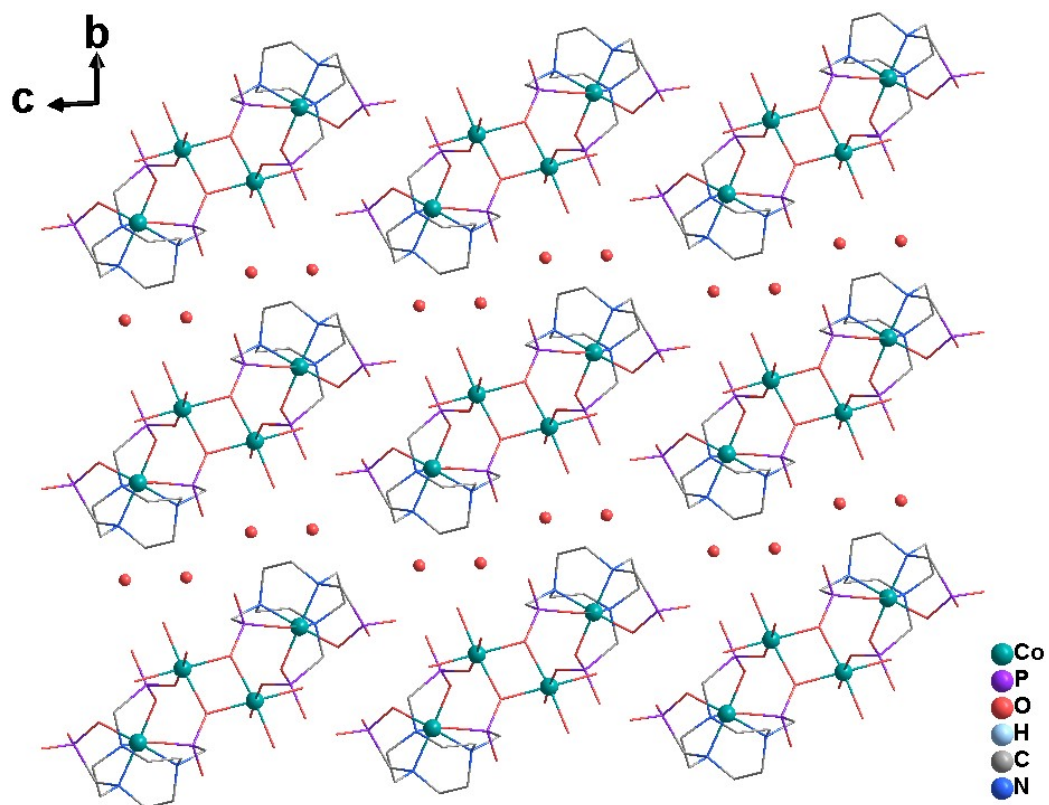

Figure S4. Packing diagram of  $1 \cdot 2\text{H}_2\text{O}$ .

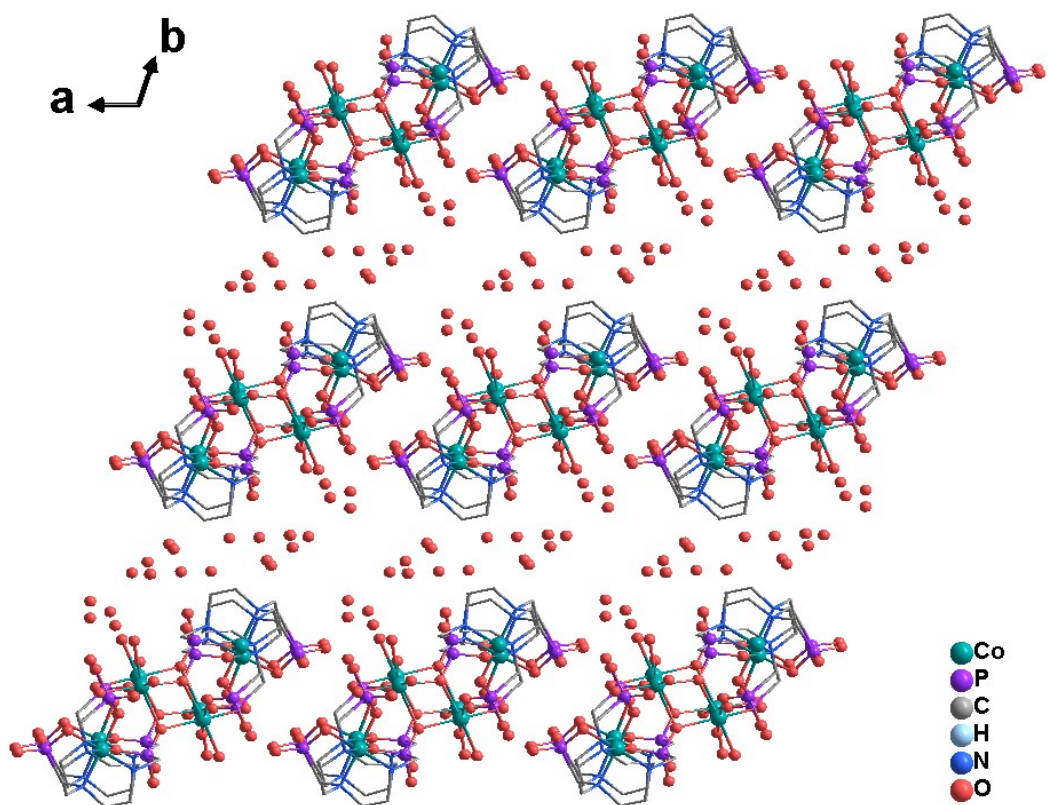

Figure S5. Packing diagram of  $1 \cdot 5\text{H}_2\text{O}$ .

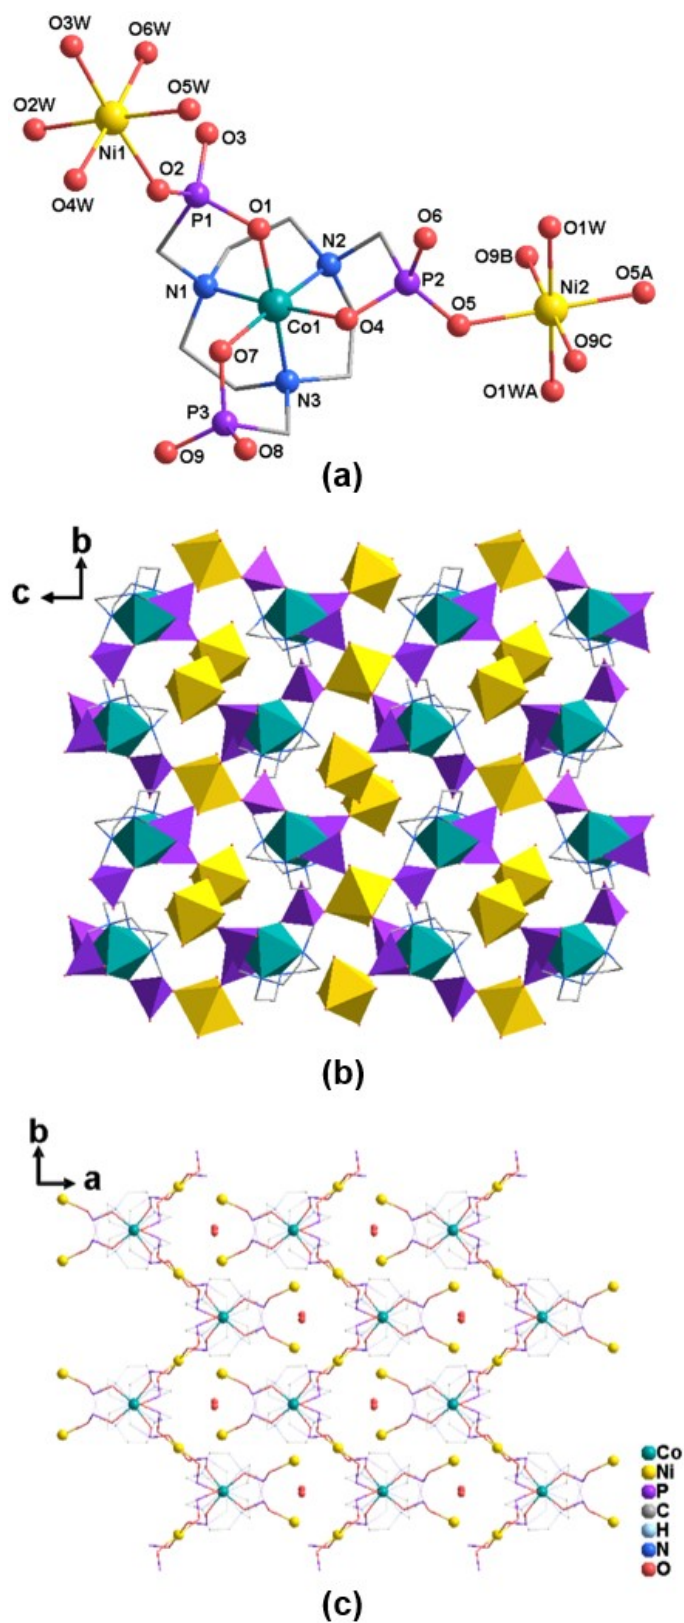

**Figure S6.** Crystal structure of 4: (a) building unit, (b) one layer, and (c) packing diagram. Color codes for polyhedral: {NiO<sub>6</sub>} yellow, {CoO<sub>3</sub>N<sub>3</sub>} cyan, and {PO<sub>3</sub>C} purple. All hydrogen atoms and coordinated water are omitted for clarity.



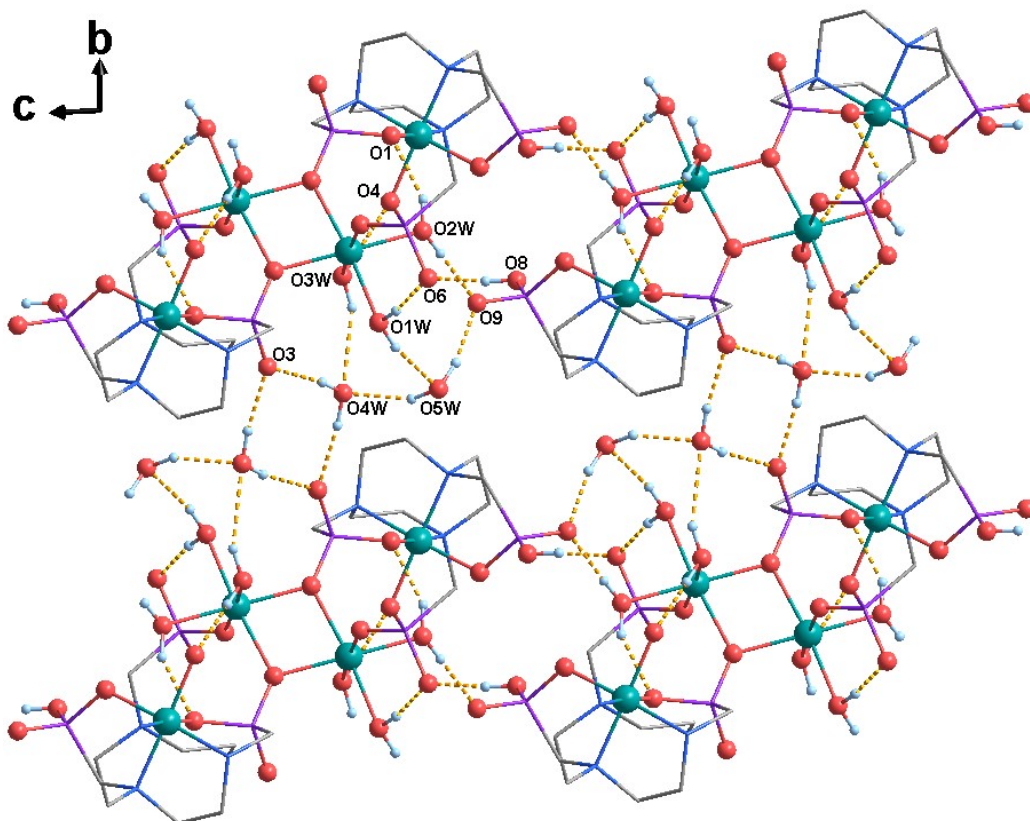

Figure S7. The H-bonding network of  $1 \cdot 2\text{H}_2\text{O}$ .

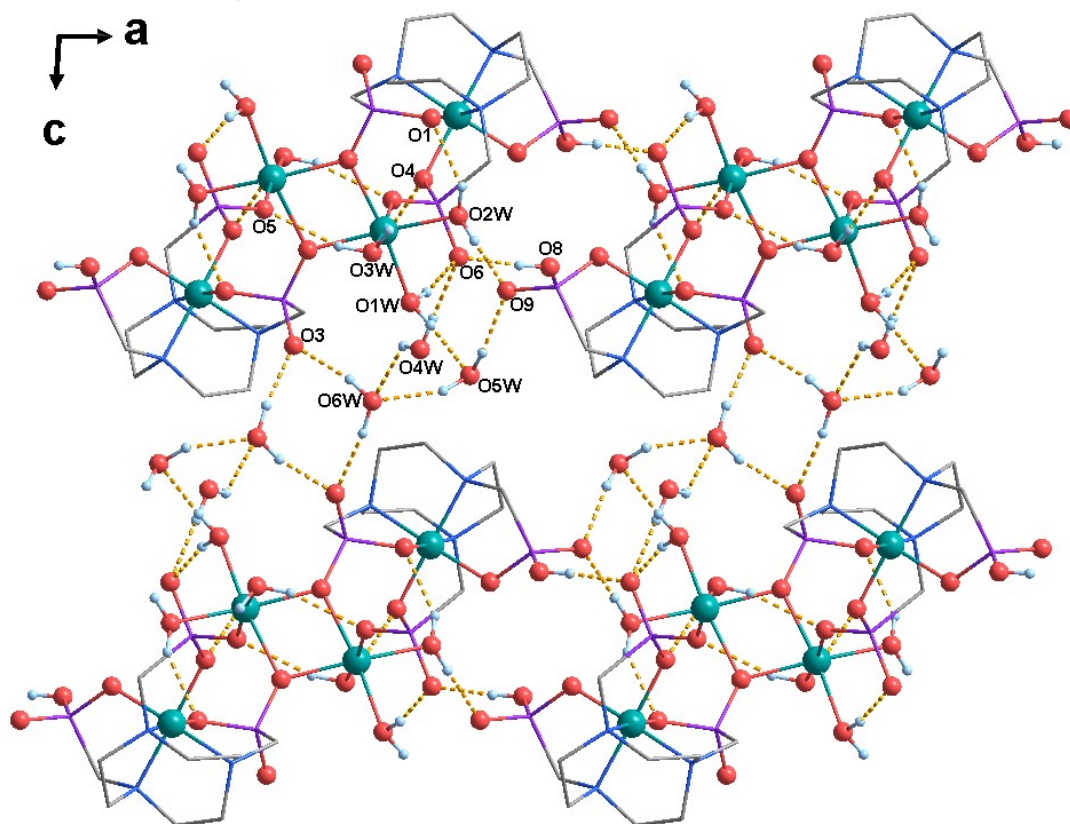

Figure S8. The H-bonding network of  $1 \cdot 3\text{H}_2\text{O}$ .

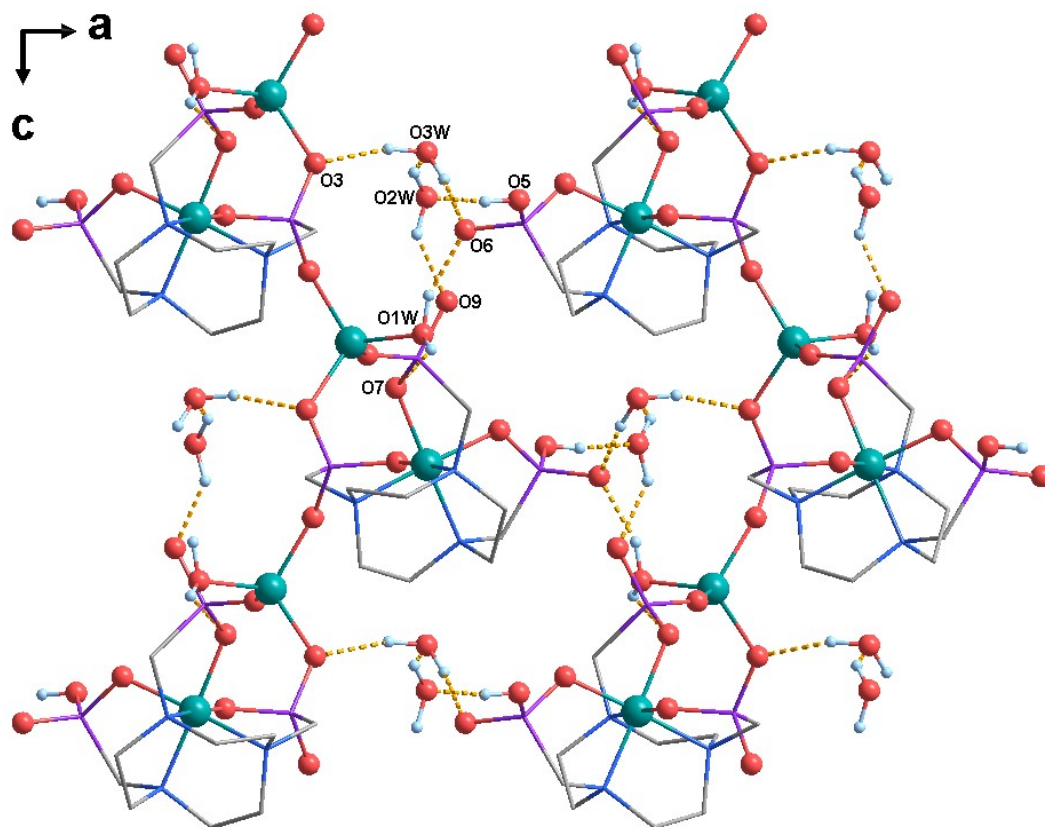

**Figure S9.** The H-bonding network of **2**.

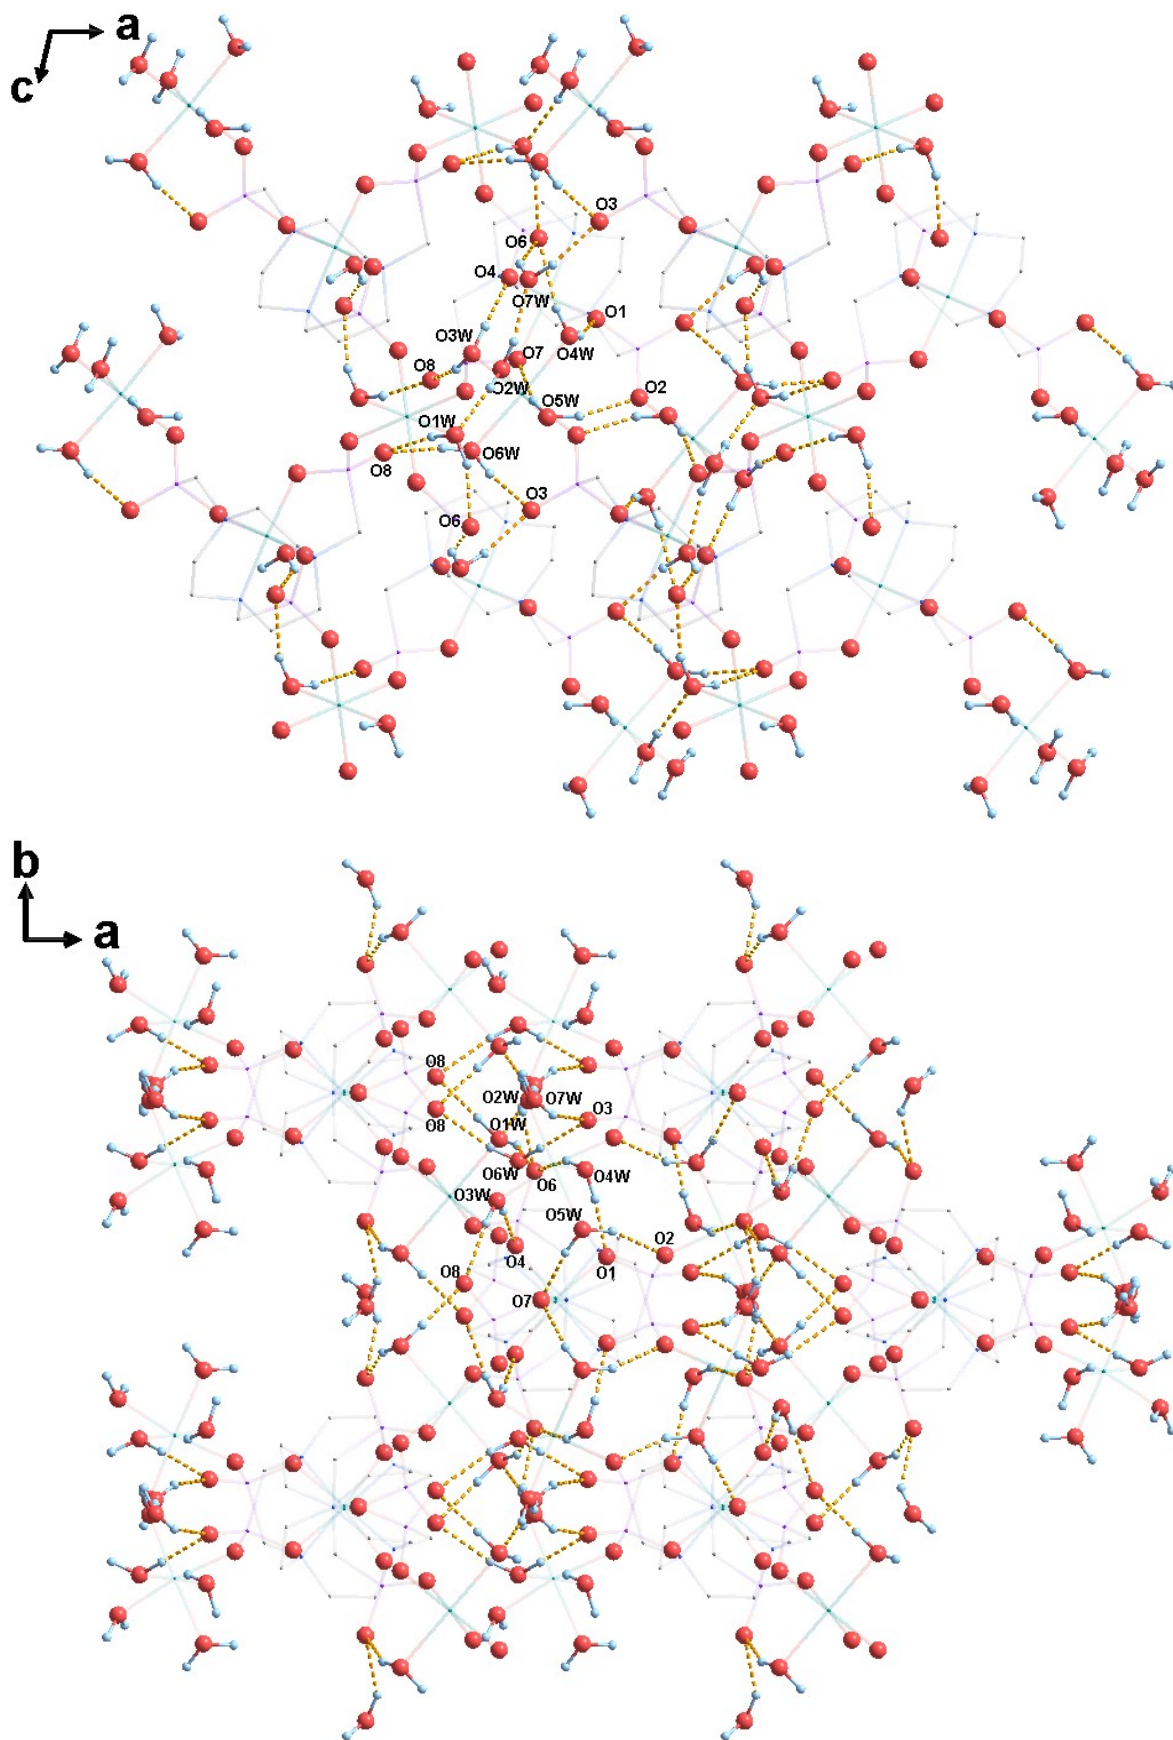

Figure S10. The H-bonding network of 3.



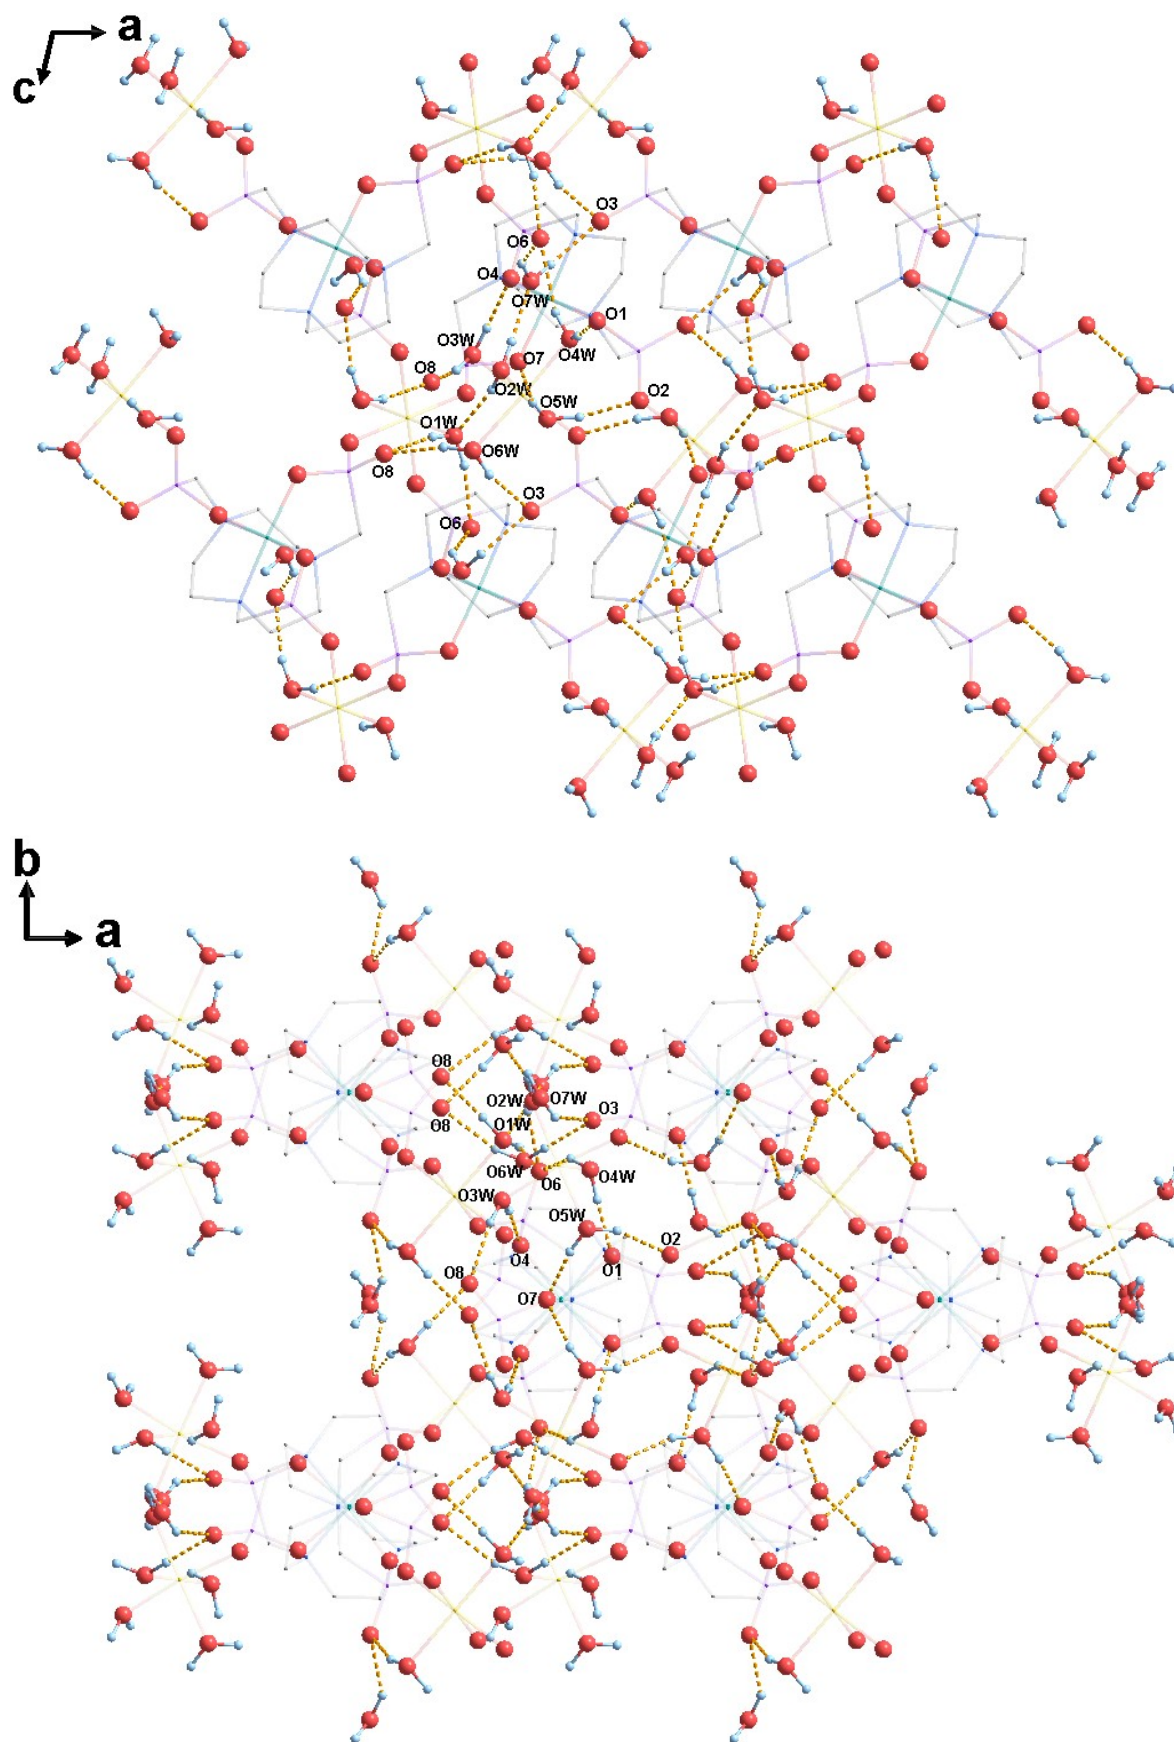

Figure S11. The H-bonding network of 4.

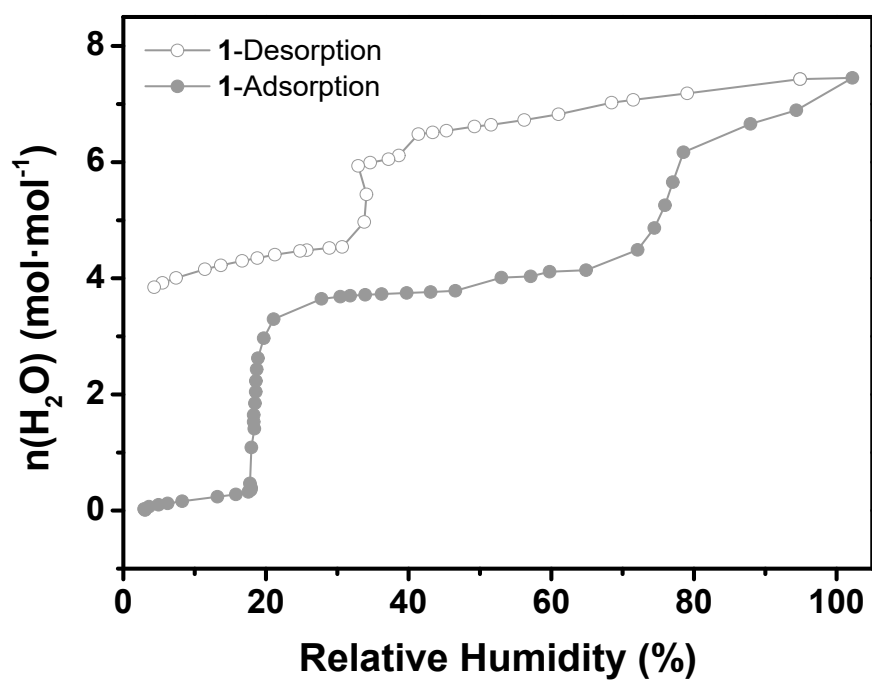

Figure S12. Water adsorption (filled circle) and desorption (open circle) isotherms of **1** at 25 °C.

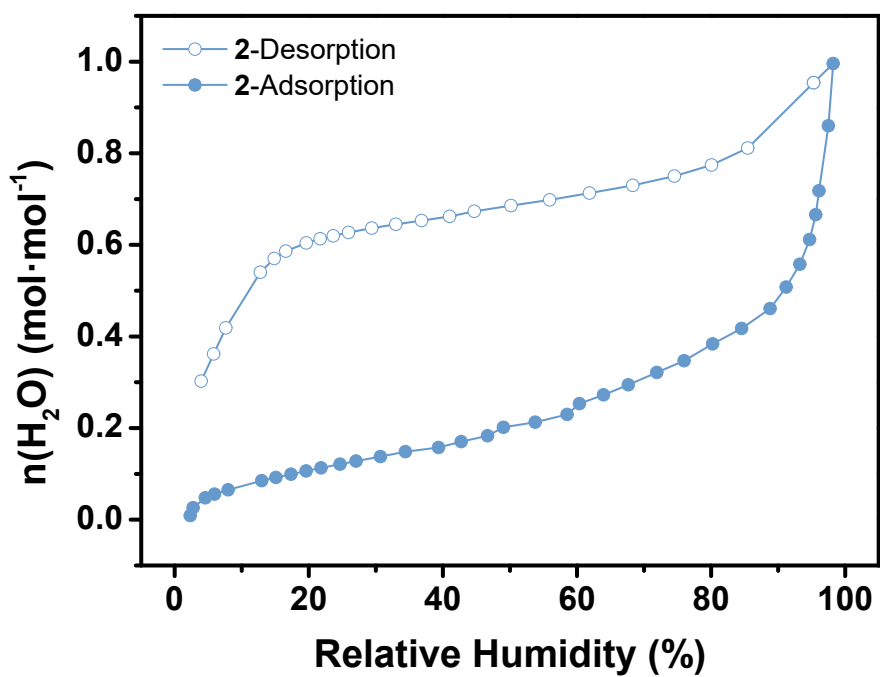

Figure S13. Water adsorption (filled circle) and desorption (open circle) isotherms of **2** at 25 °C.

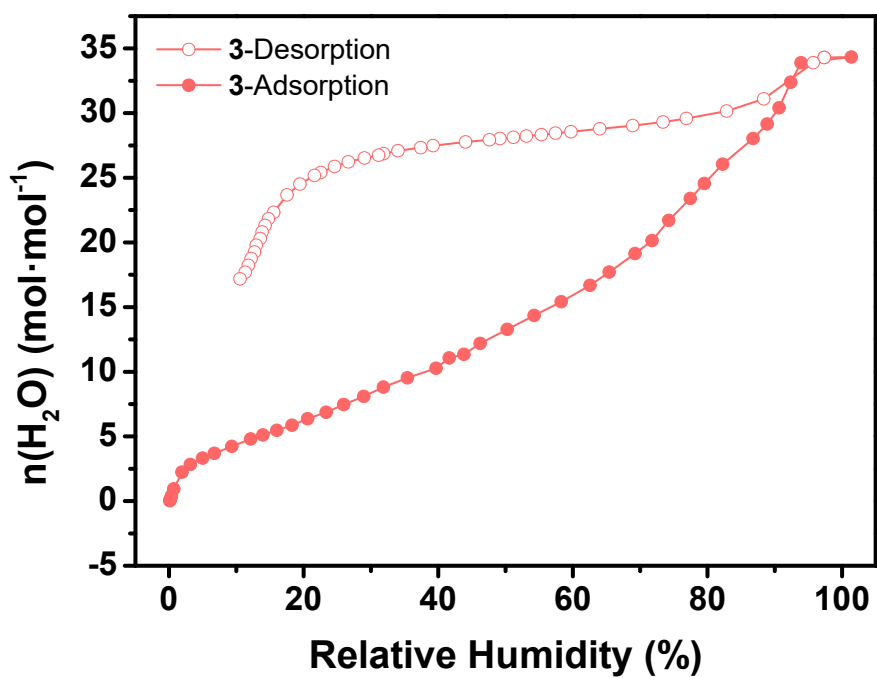

Figure S14. Water adsorption (filled circle) and desorption (open circle) isotherms of **3** at 25 °C.

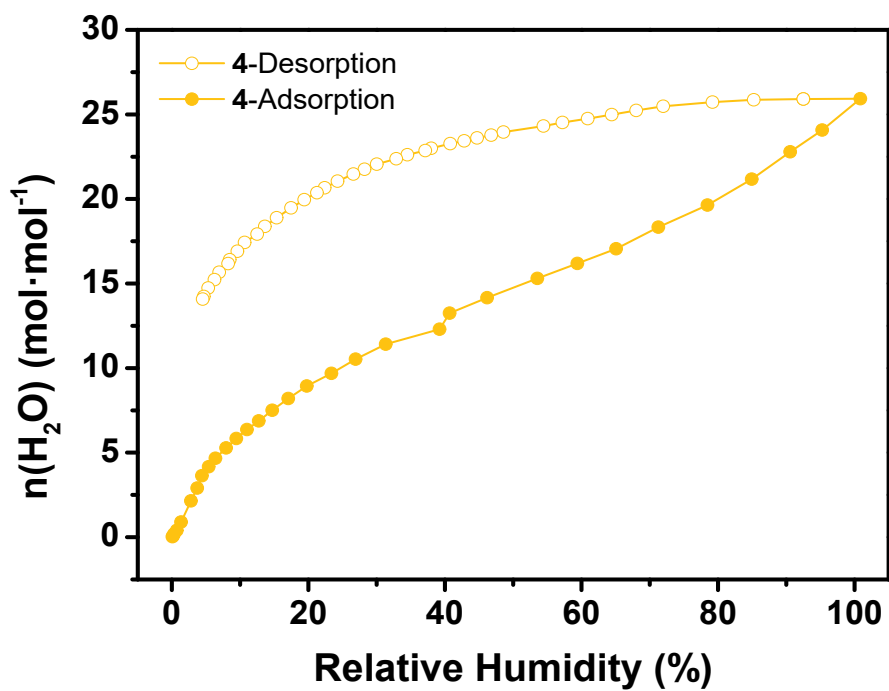

Figure S15. Water adsorption (filled circle) and desorption (open circle) isotherms of **4** at 25 °C.

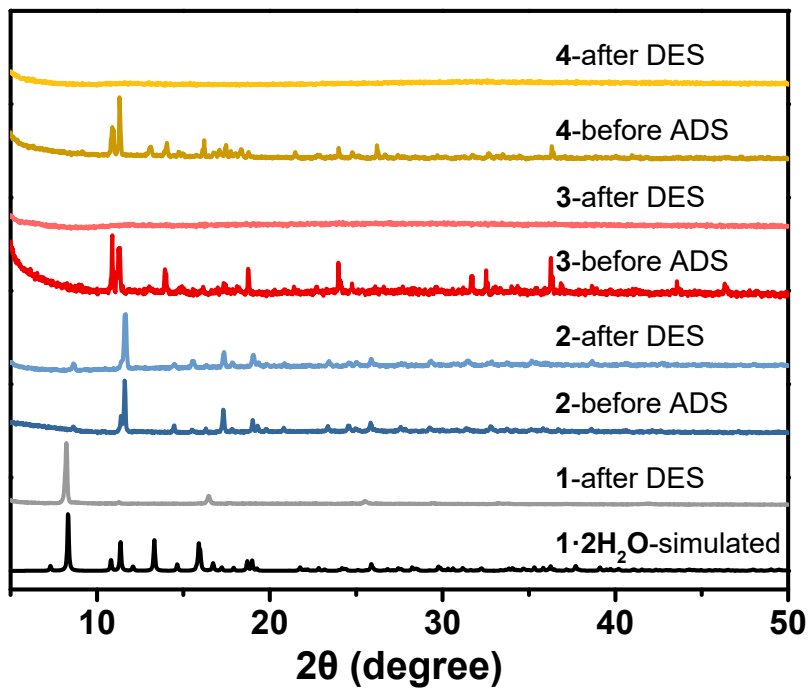

Figure S16. PXRD patterns for 1 - 4 after desorption.

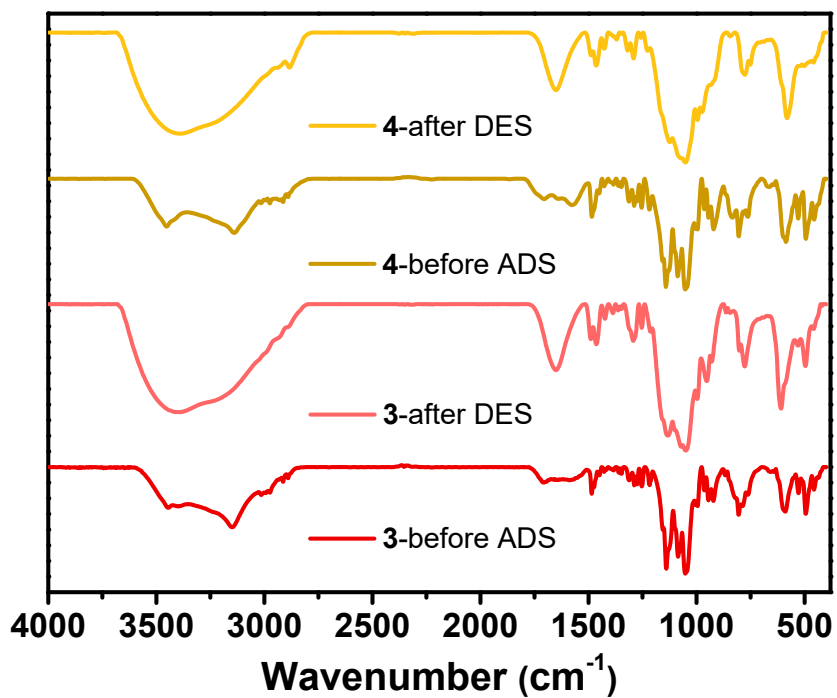

Figure S17. IR spectra of 3 and 4 after desorption.

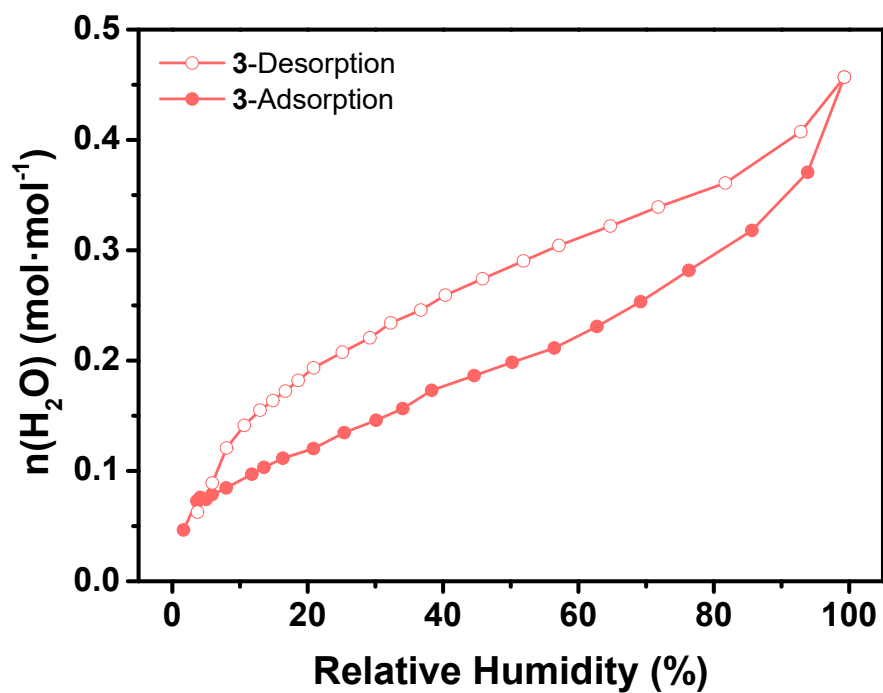

**Figure S18.** Water adsorption (filled circle) and desorption (open circle) isotherms of **3** (without thermal pretreatment) at 25 °C.

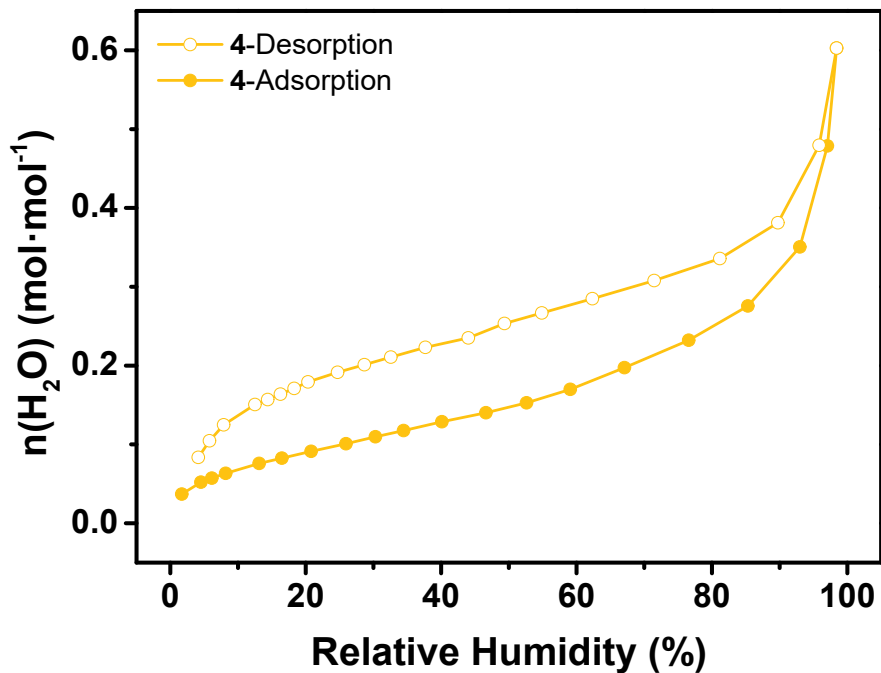

**Figure S19.** Water adsorption (filled circle) and desorption (open circle) isotherms of **4** (without thermal pretreatment) at 25 °C.

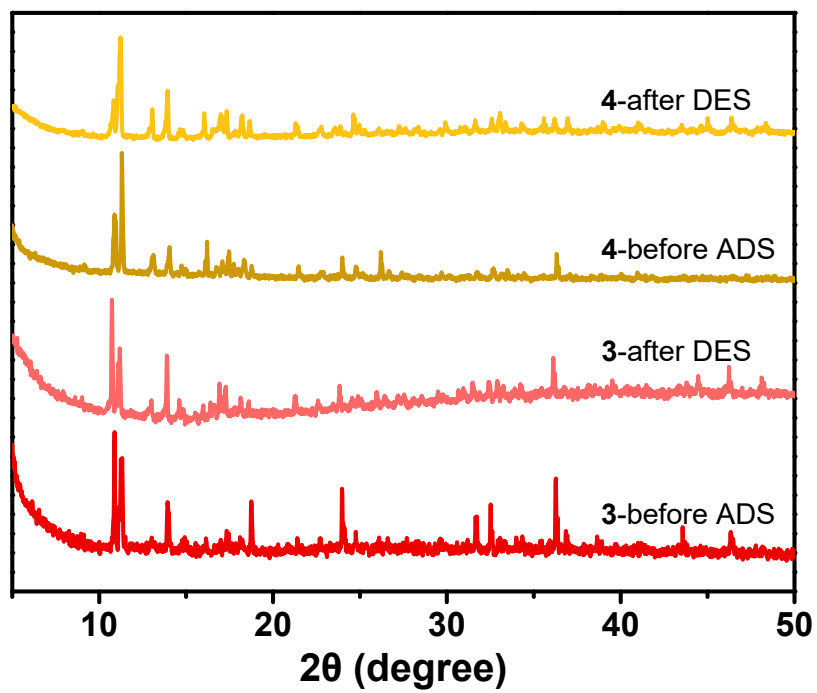

**Figure S20.** PXRD patterns for **3** and **4** after desorption without thermal pretreatment.

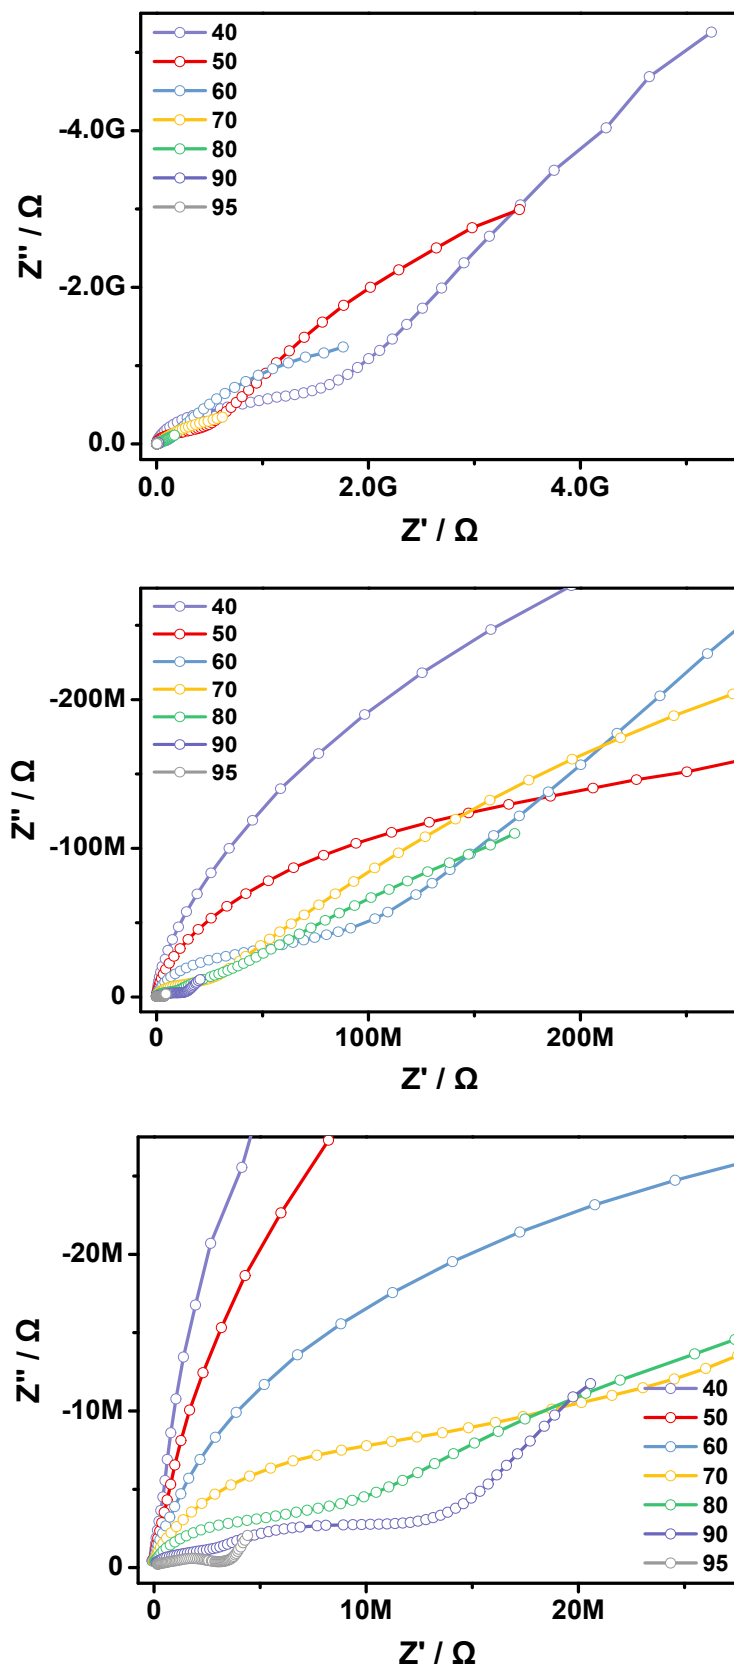

**Figure S21.** Nyquist plots for the pellet of **1** at 25 °C and various RH. Up: RH increases from 40 to 95%; Middle and Bottom: the enlarged view of the graph.

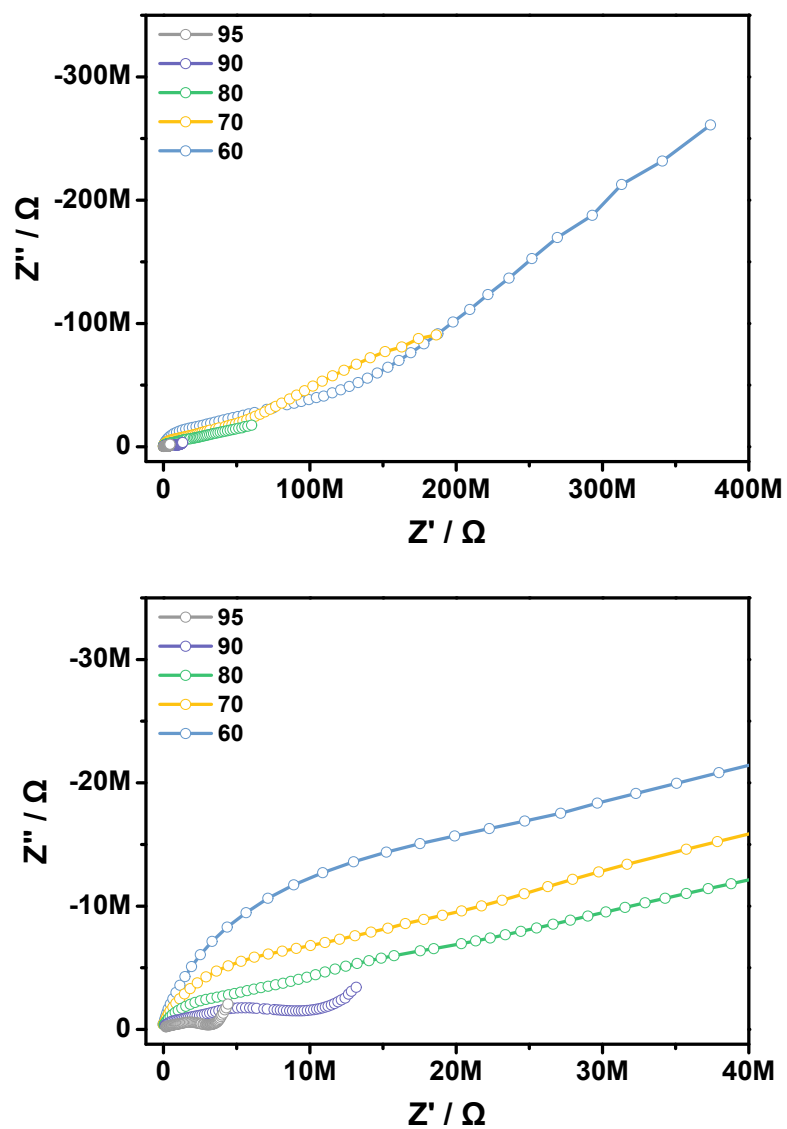

**Figure S22.** Nyquist plots for the pellet of compound **1** at 25 °C and various RH. Up: RH decreases from 95 to 60%; Bottom: the enlarged view of the graph.



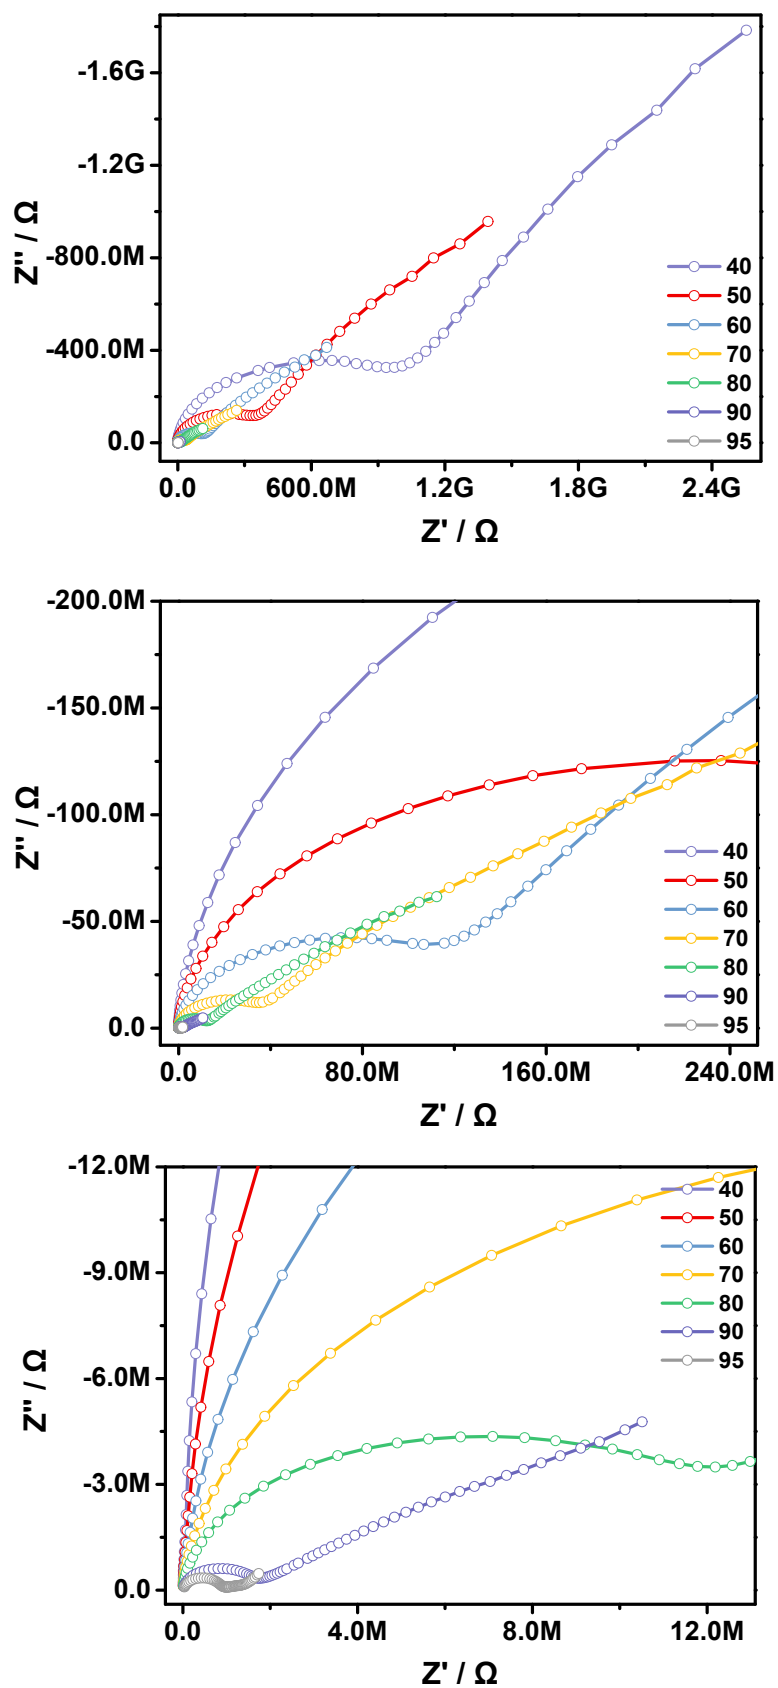

**Figure S23.** Nyquist plots for the pellet of compound **2** at 25 °C and various RH. Up: RH increases from 40 to 95%; Middle and Bottom: the enlarged view of the graph.

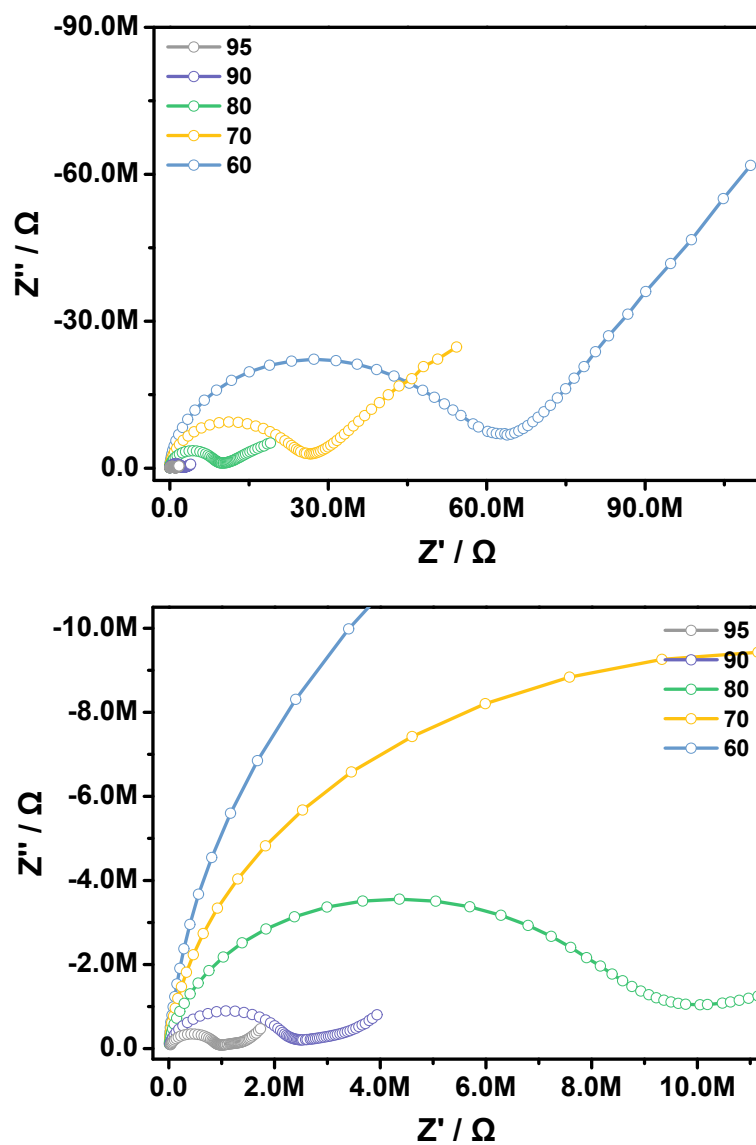

**Figure S24.** Nyquist plots for the pellet of compound **2** at 25 °C and various RH. Up: RH decreases from 95 to 60%; Bottom: the enlarged view of the graph.

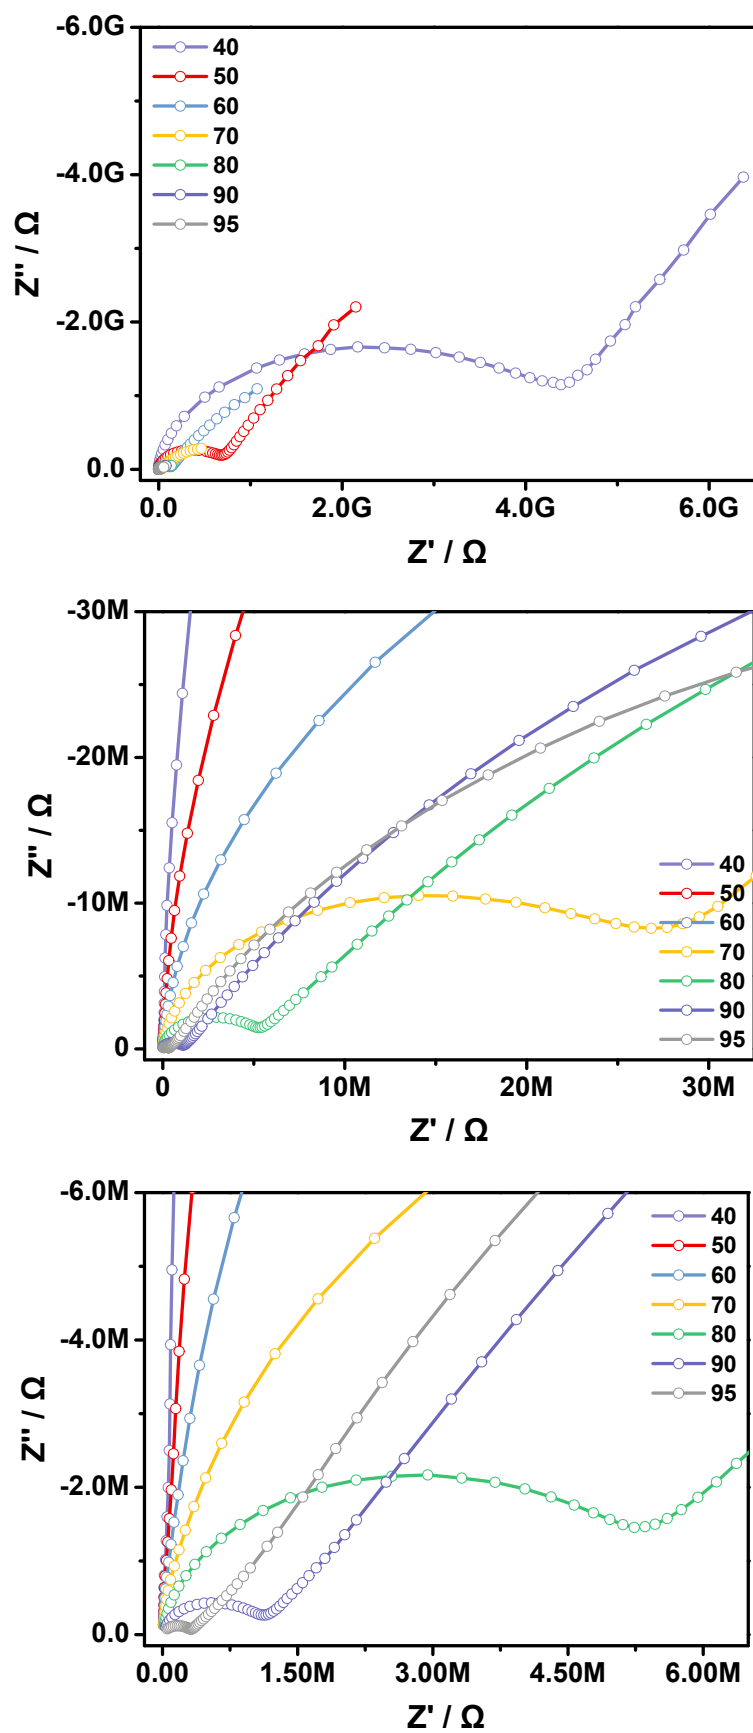

**Figure S25.** Nyquist plots for the pellet of compound **3** at 25 °C and various RH. Up: RH increases from 40 to 95%; Middle and Bottom: the enlarged view of the graph.

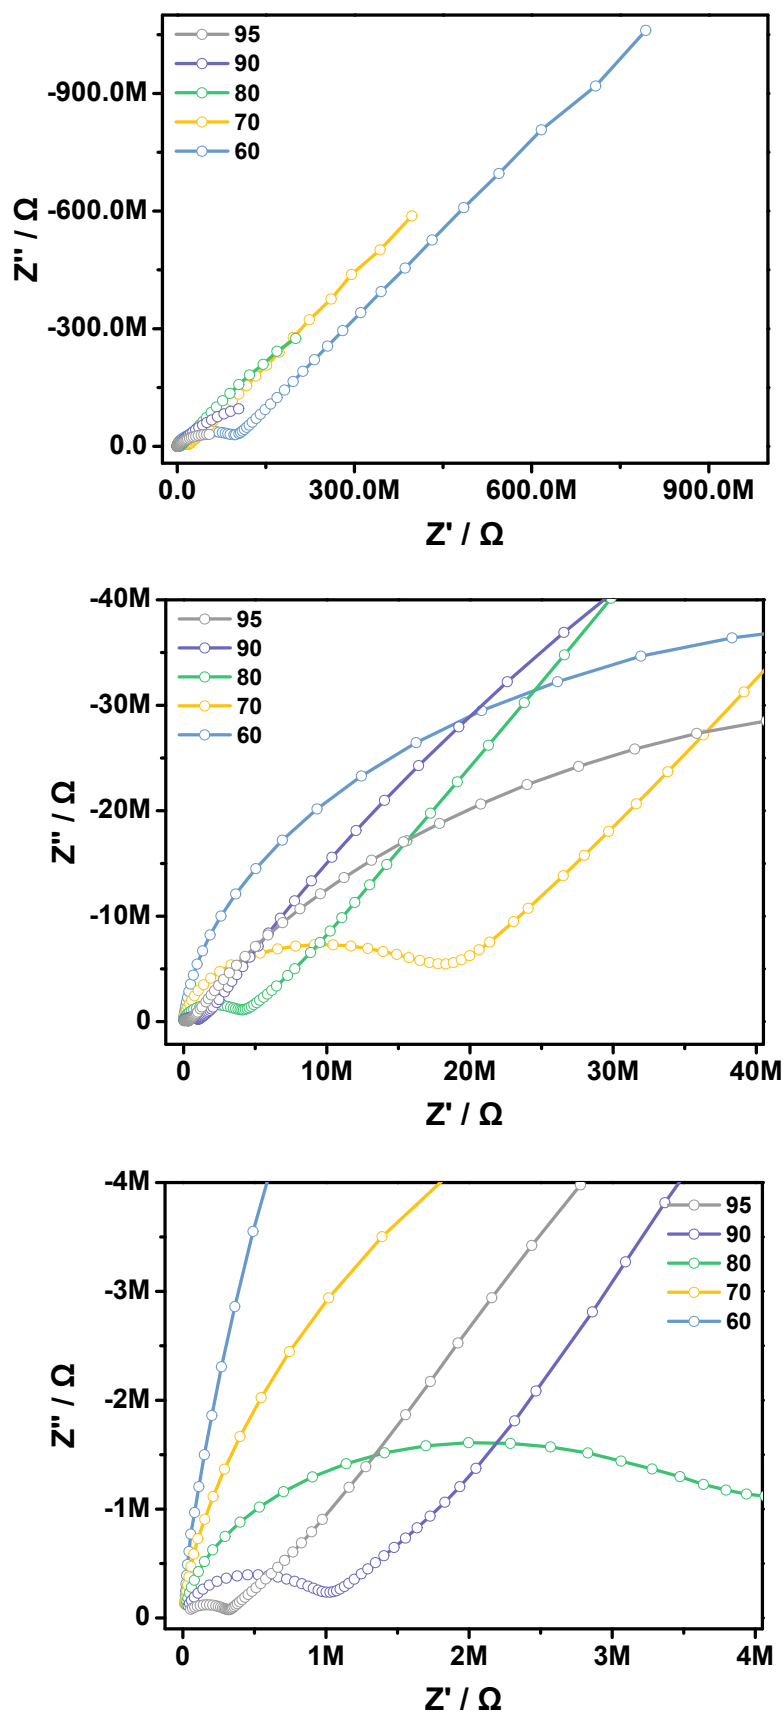

**Figure S26.** Nyquist plots for the pellet of compound **3** at 25 °C and various RH. Up: RH decreases from 95 to 60%; Middle and Bottom: the enlarged view of the graph.

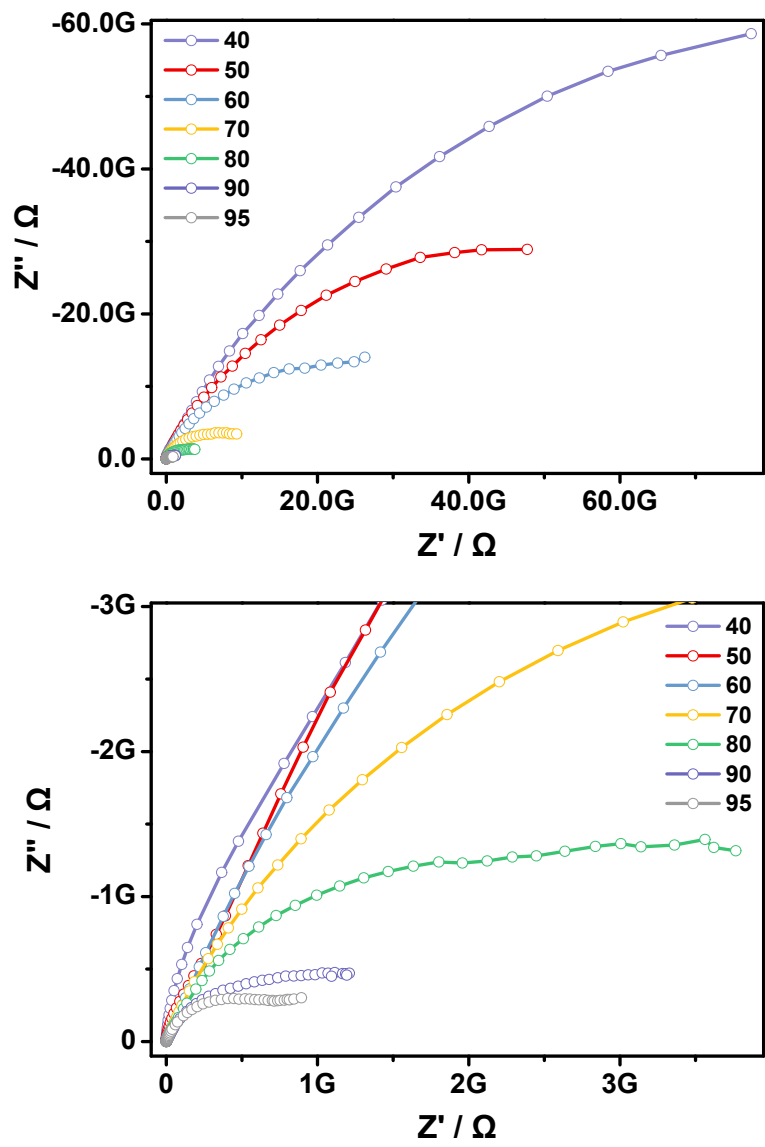

**Figure S27.** Nyquist plots for the pellet of compound **4** at 25 °C and various RH. Up: RH increases from 40 to 95%; Bottom: the enlarged view of the graph.

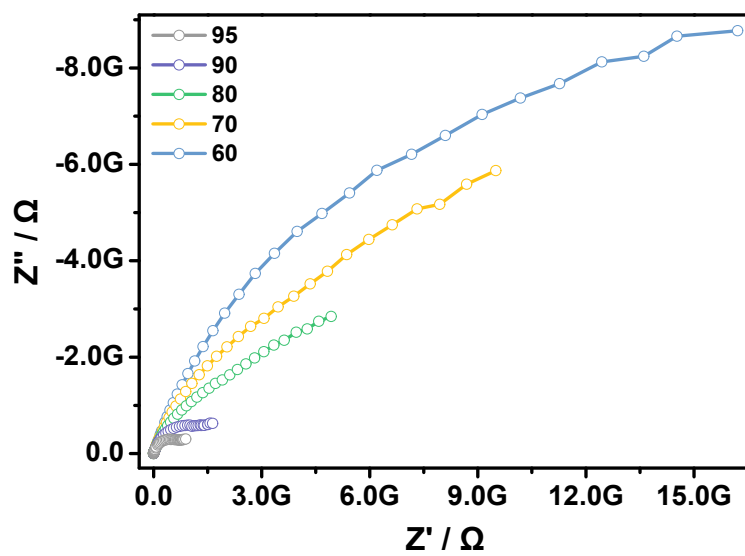

**Figure S28.** Nyquist plots for the pellet of compound **4** at 25 °C and various RH (from 95 to 60%).

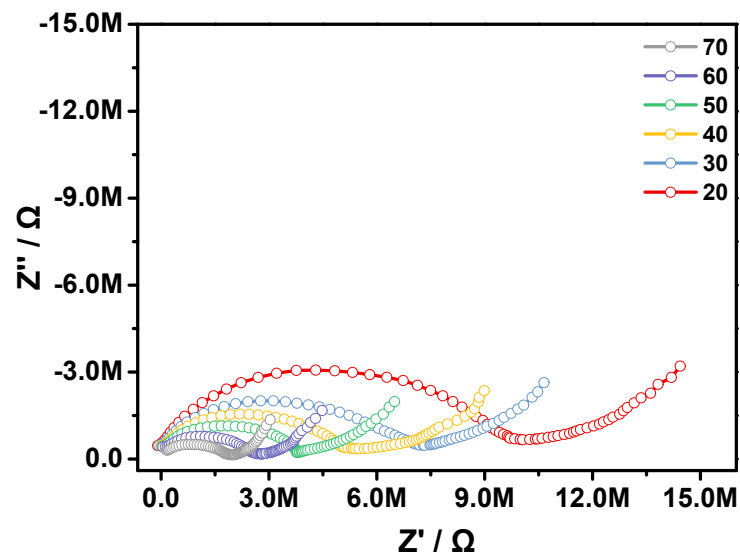

Figure S29. Nyquist plots for the pellet of 1 at 95% RH and various temperatures (from 70 to 20 °C).

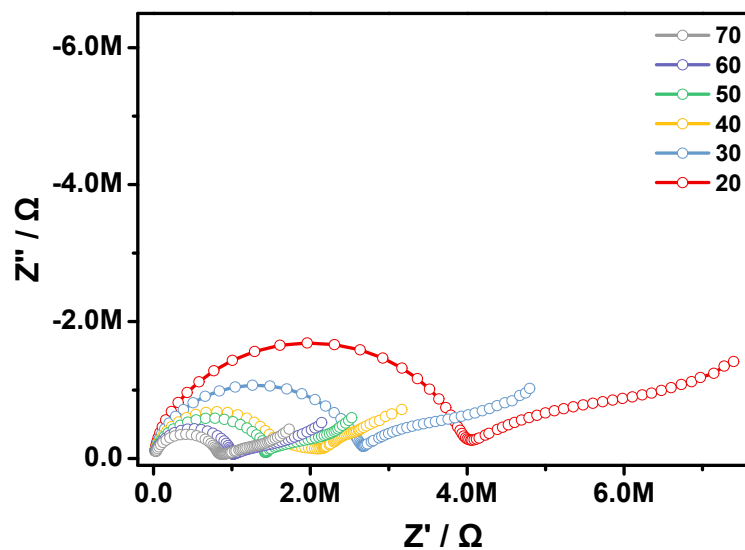

Figure S30. Nyquist plots for the pellet of 2 at 95% RH and various temperatures (from 70 to 20 °C).

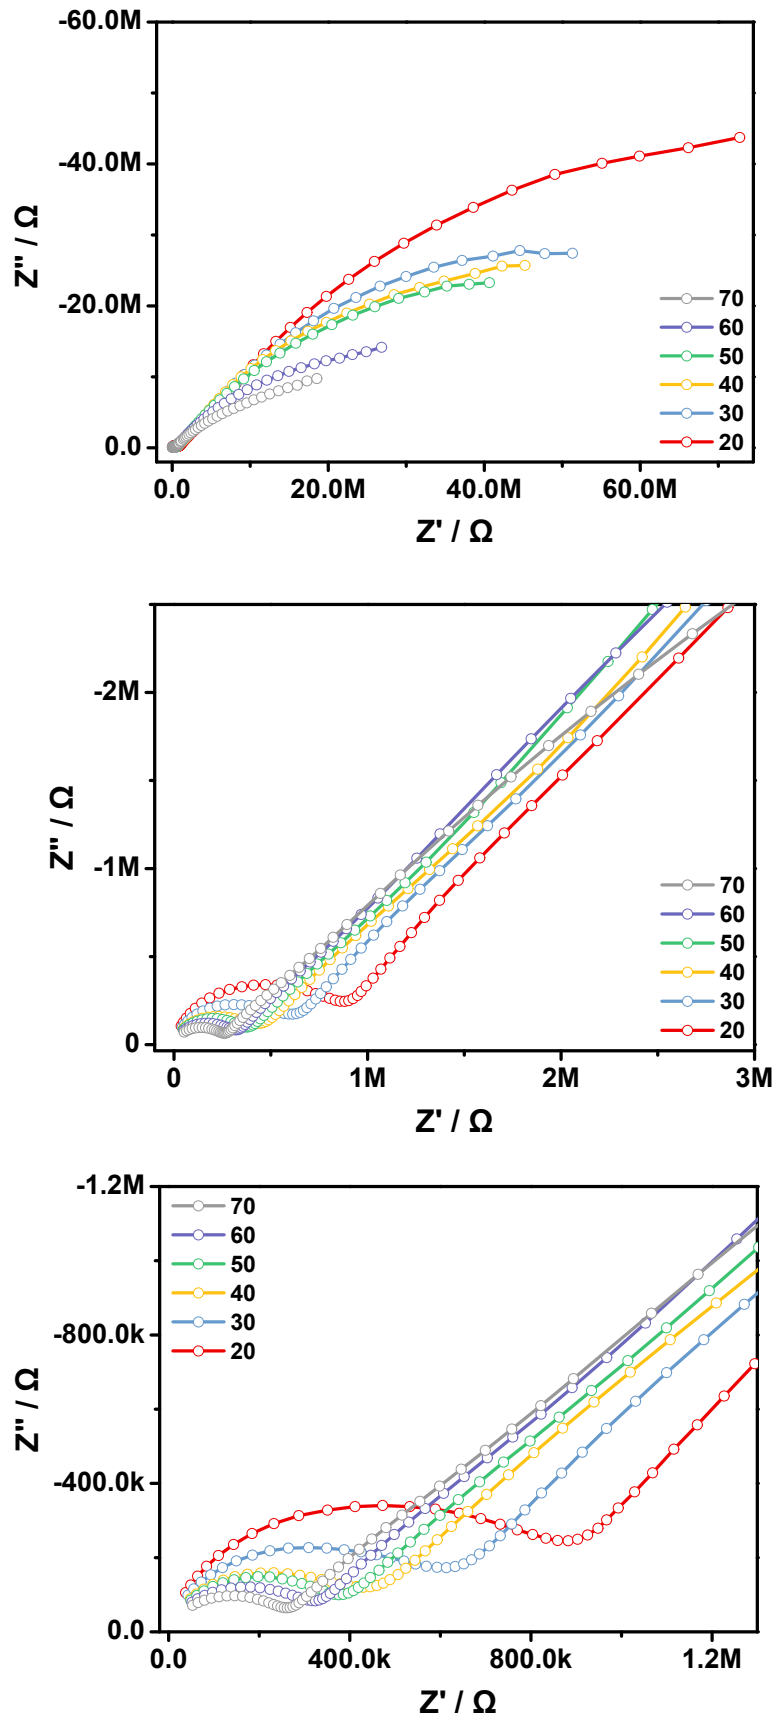

**Figure S31.** Nyquist plots for the pellet of **3** at 95% RH and various temperatures. Up: temperature decreases from 70 to 20 °C; Middle and Bottom: the enlarged view of the graph.



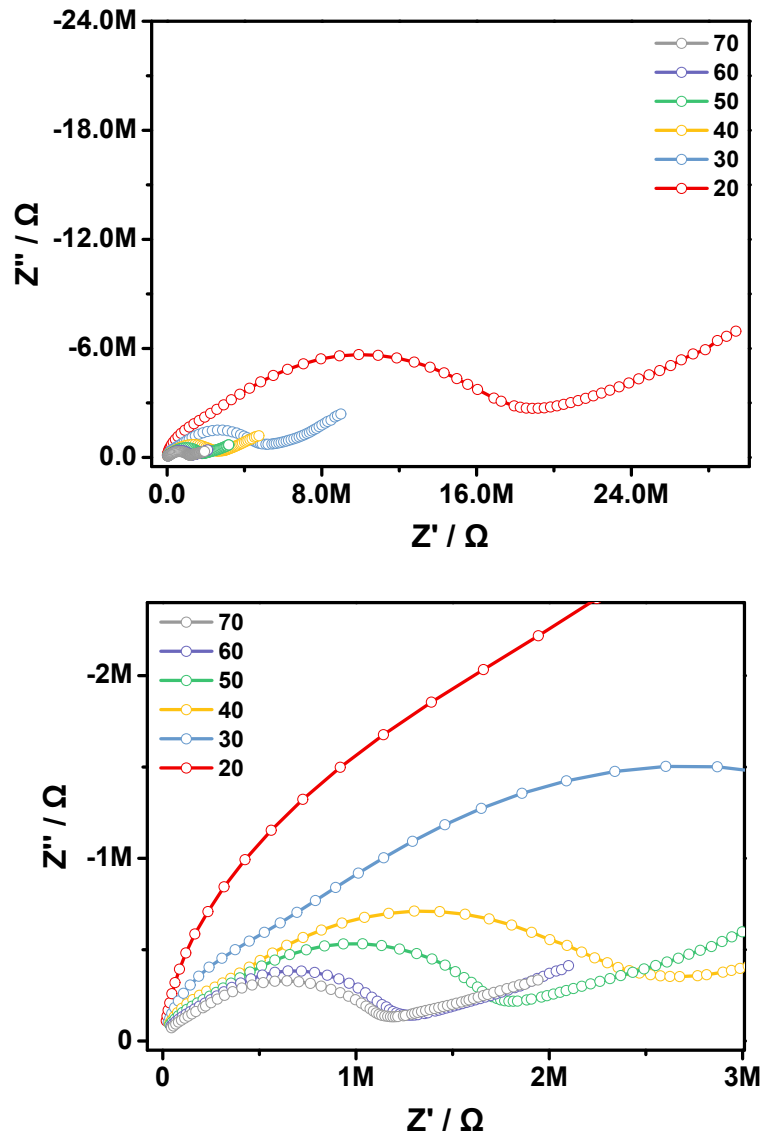

**Figure S32.** Nyquist plots for the pellet of 4 at 95% RH and various temperatures. Up: temperature decreases from 70 to 20 °C; Bottom: the enlarged view of the graph.

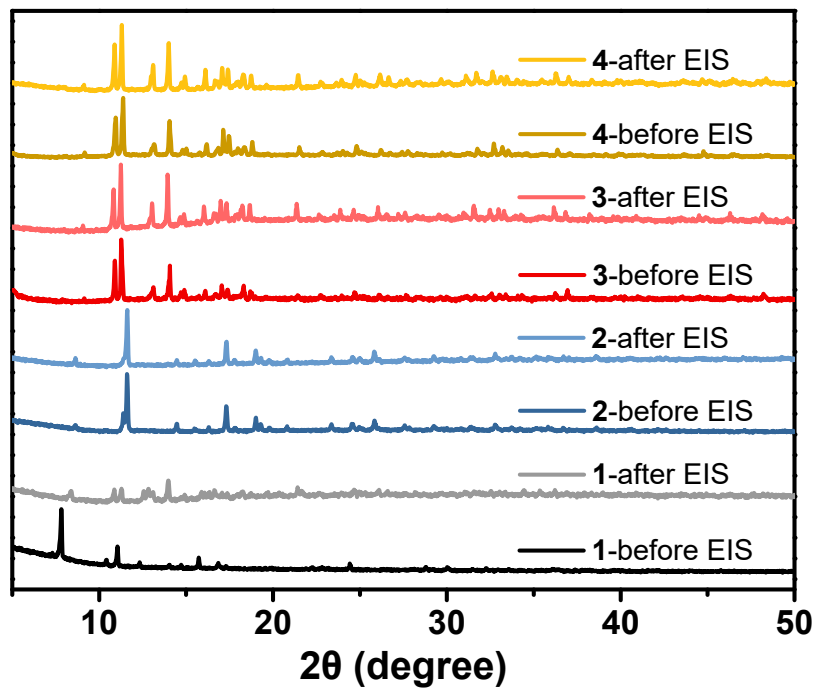

Figure S33. PXRD patterns for 1 - 4 after AC impedance measurements.

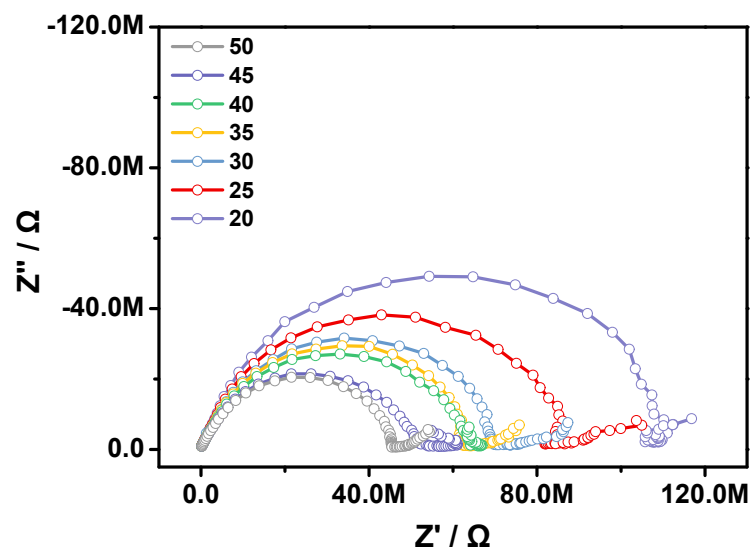

**Figure S34.** Nyquist plots for a single crystal of **3** at 95% RH and various temperatures (from 50 to 20 °C).

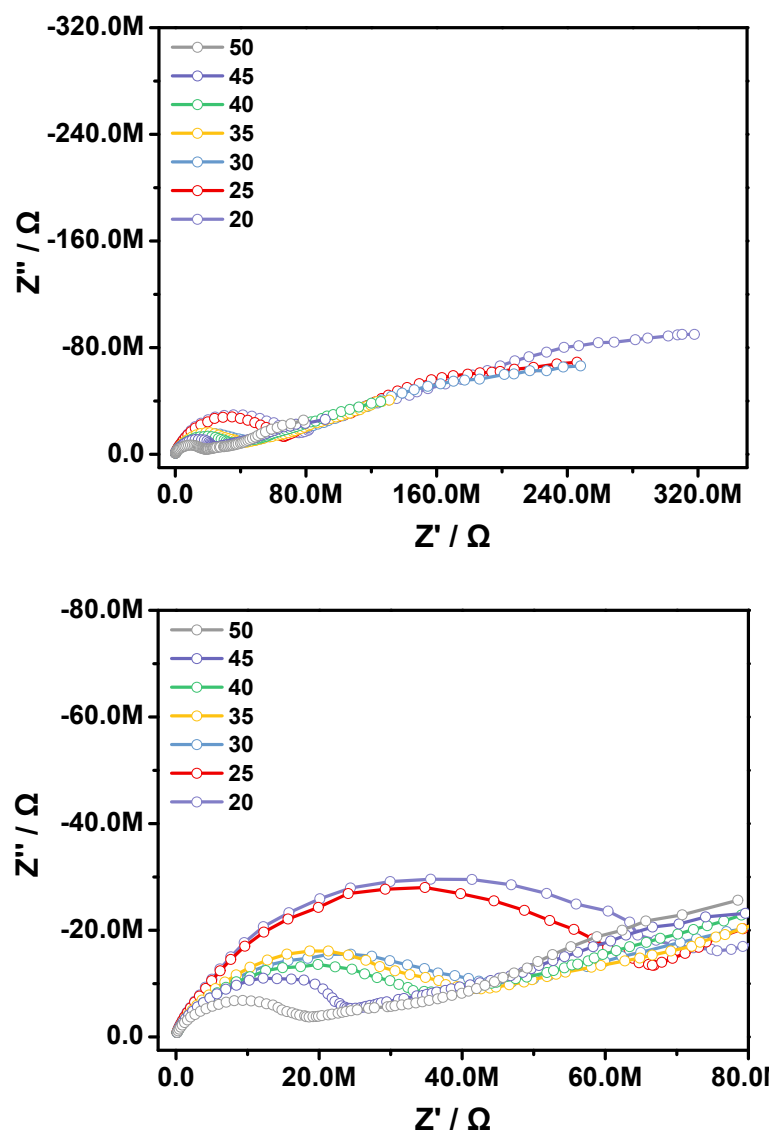

**Figure S35.** Nyquist plots for a single crystal of **4** at 95% RH and various temperatures. Up: temperature decreases from 50 to 20 °C; Bottom: the enlarged view of the graph.
